# Supplementary material for: Leveraging Large-Scale Genetics of PTSD and Cardiovascular Disease to Demonstrate Robust Shared Risk and Improve Risk Prediction Accuracy
Source: Atypon-hosted journal article supplement (doi:10.1176/appi.ajp.21111113), 2022-09-07

FIGURE S5. MGBB\_CAD\_manhattan

Note. Manhattan plot for coronary artery disease (CAD);  
MGBB = MassGeneral Brigham Biobank.

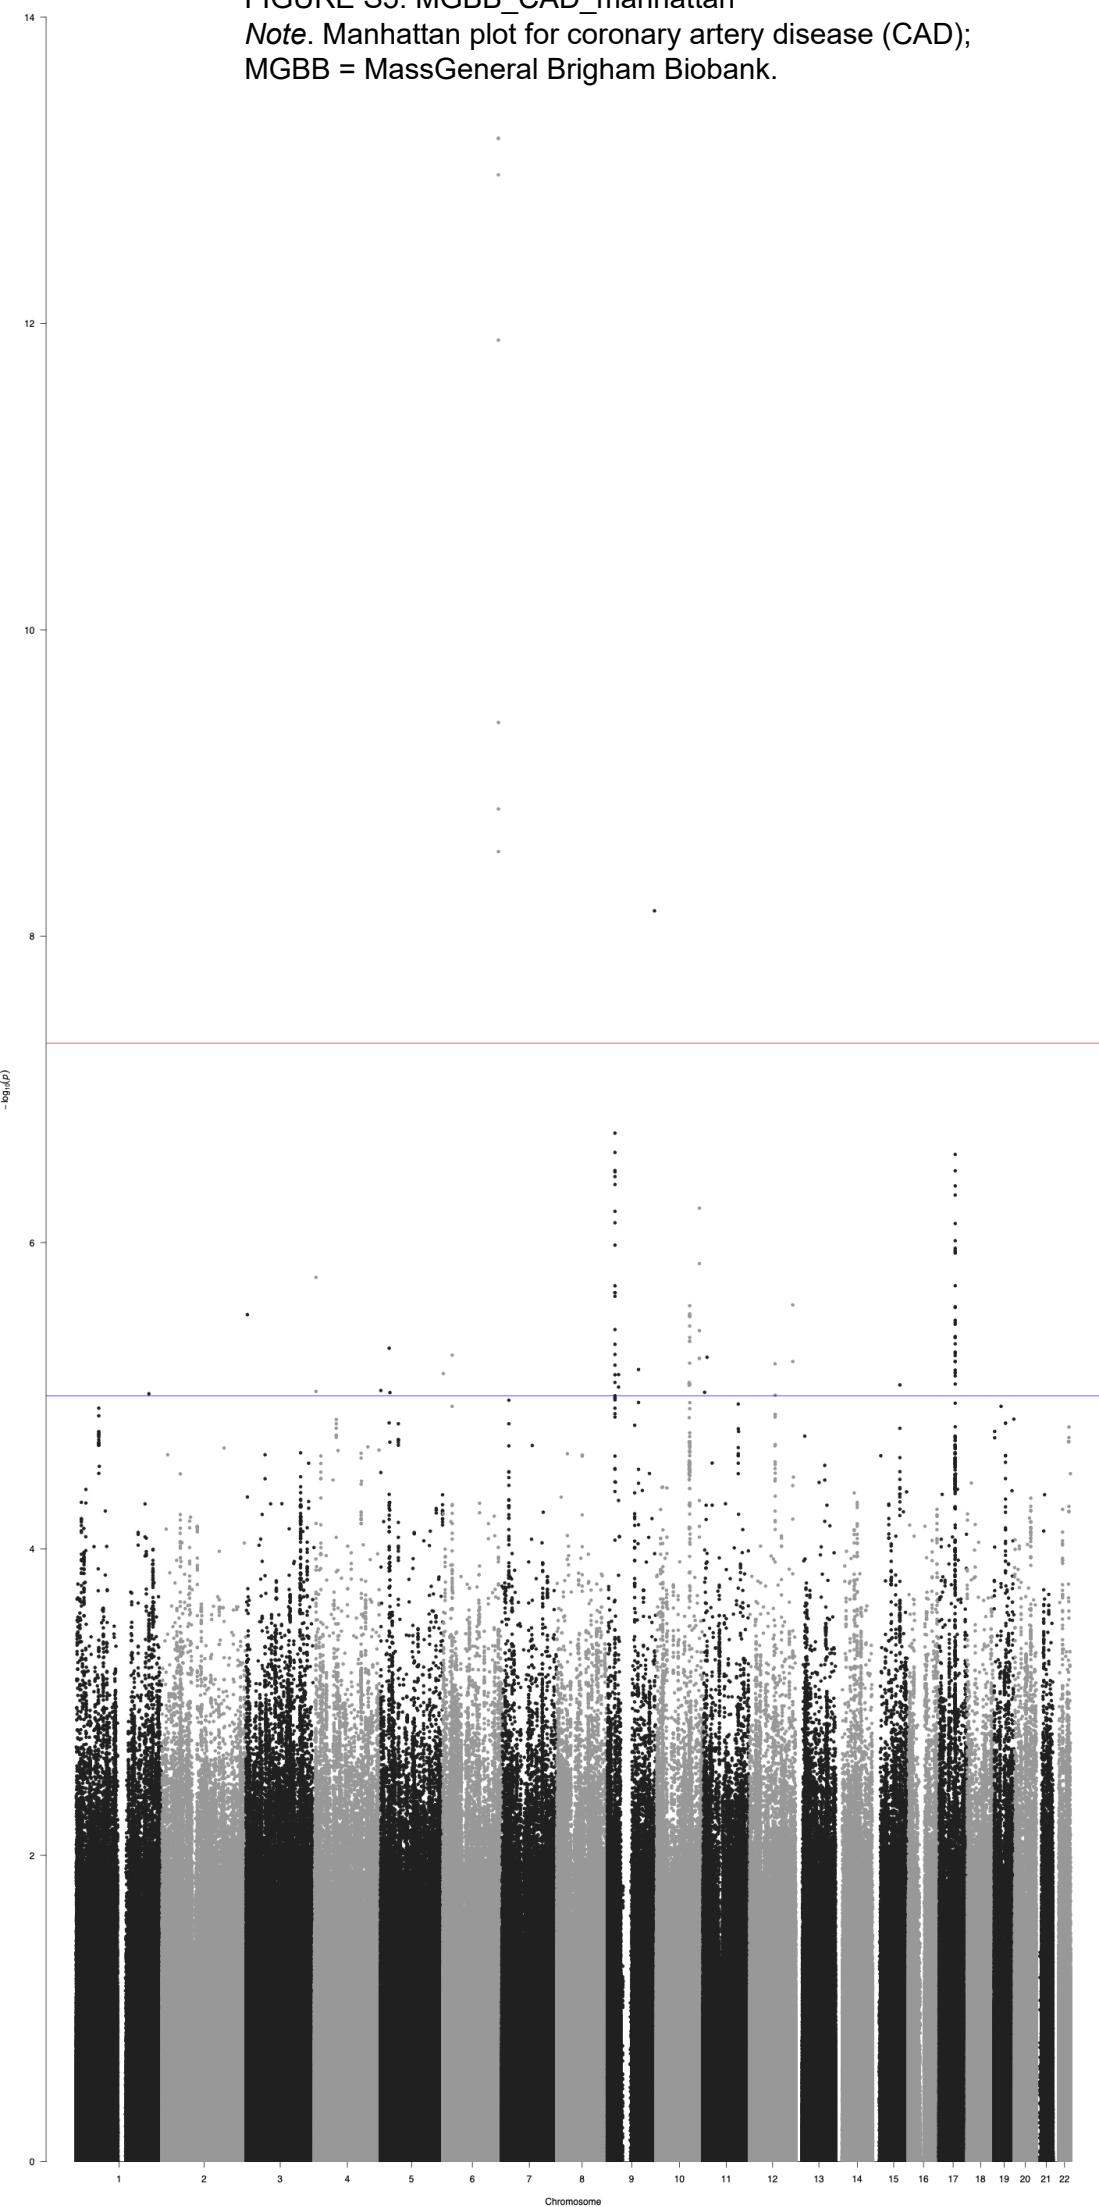

FIGURE S6. MGBB\_CAD\_qq

*Note.* QQ plot for coronary artery disease (CAD);  
MGBB = MassGeneral Brigham Biobank.

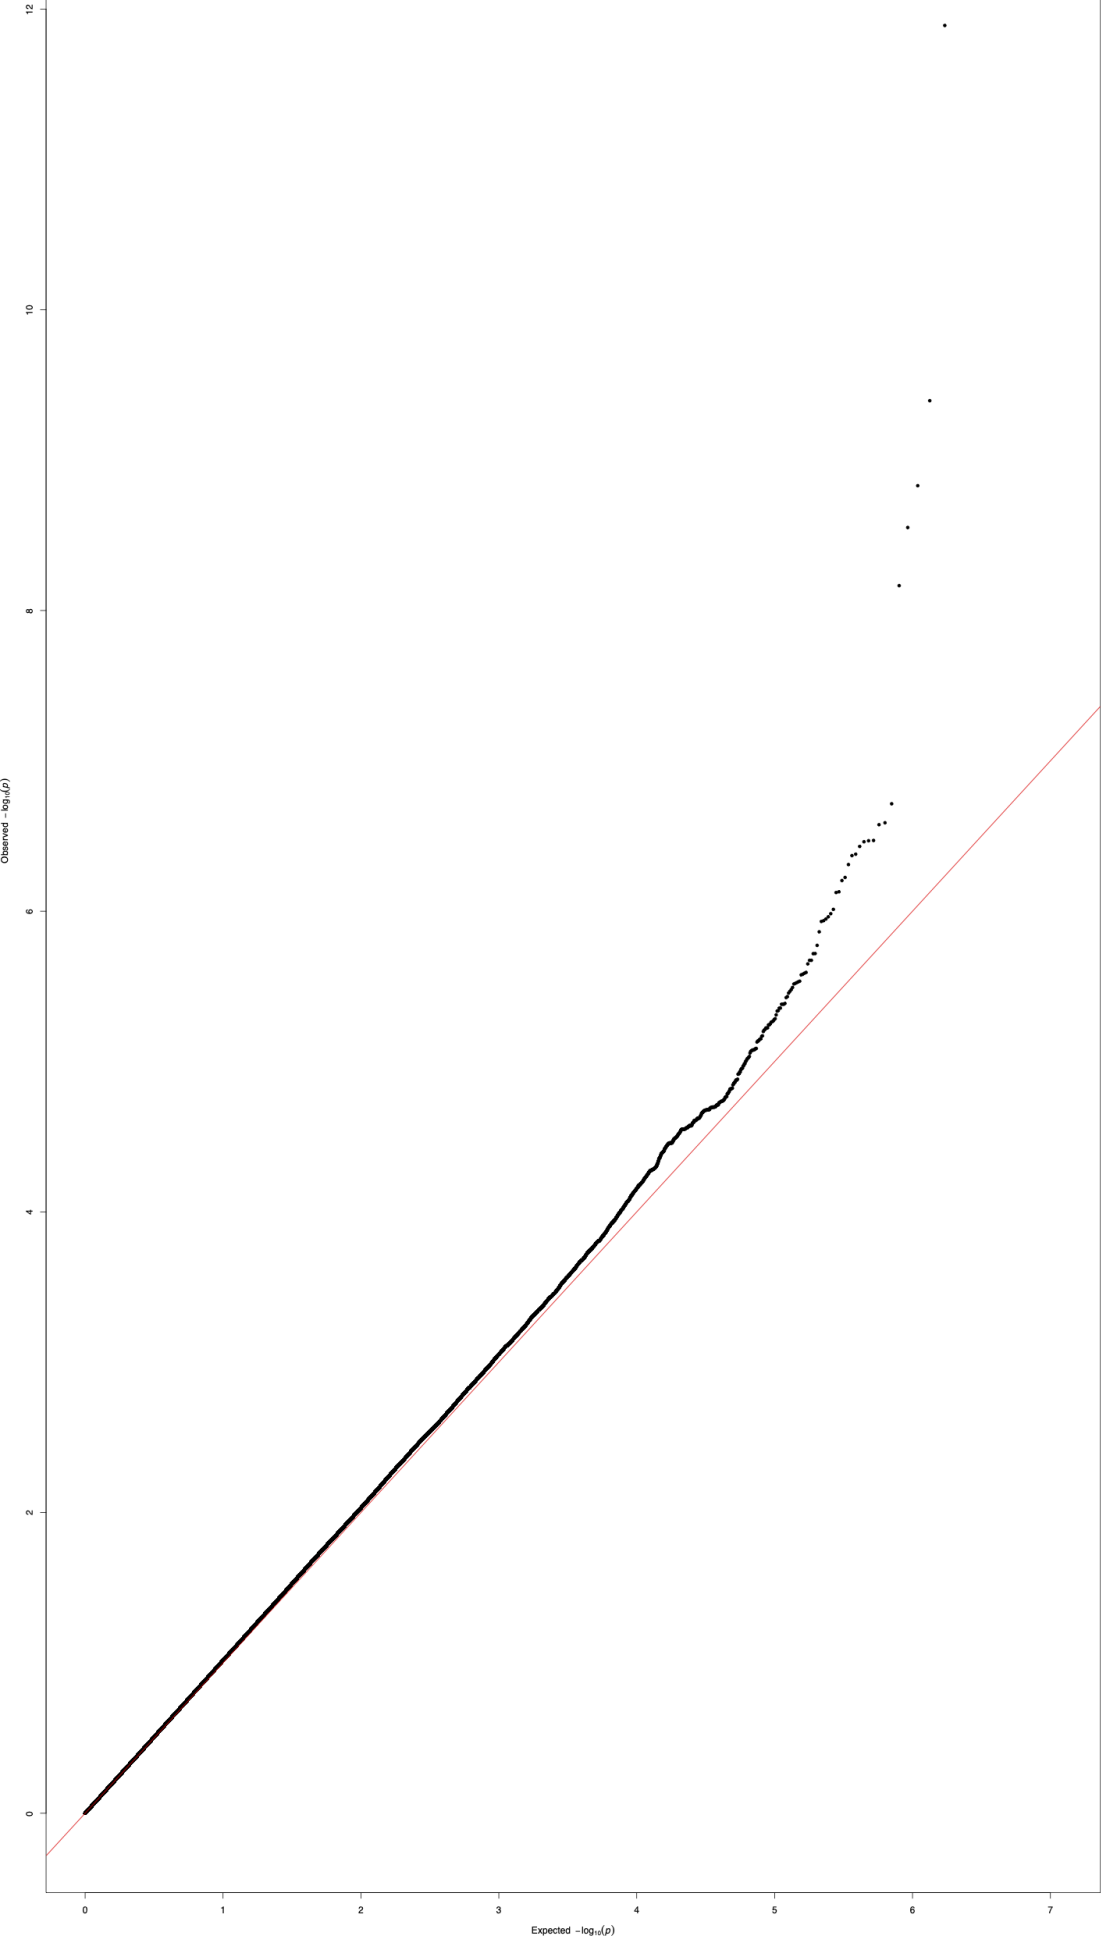

FIGURE S7. MGBB\_CHF\_manhattan

Note. Manhattan plot for coronary heart failure (CHF);  
MGBB = MassGeneral Brigham Biobank.

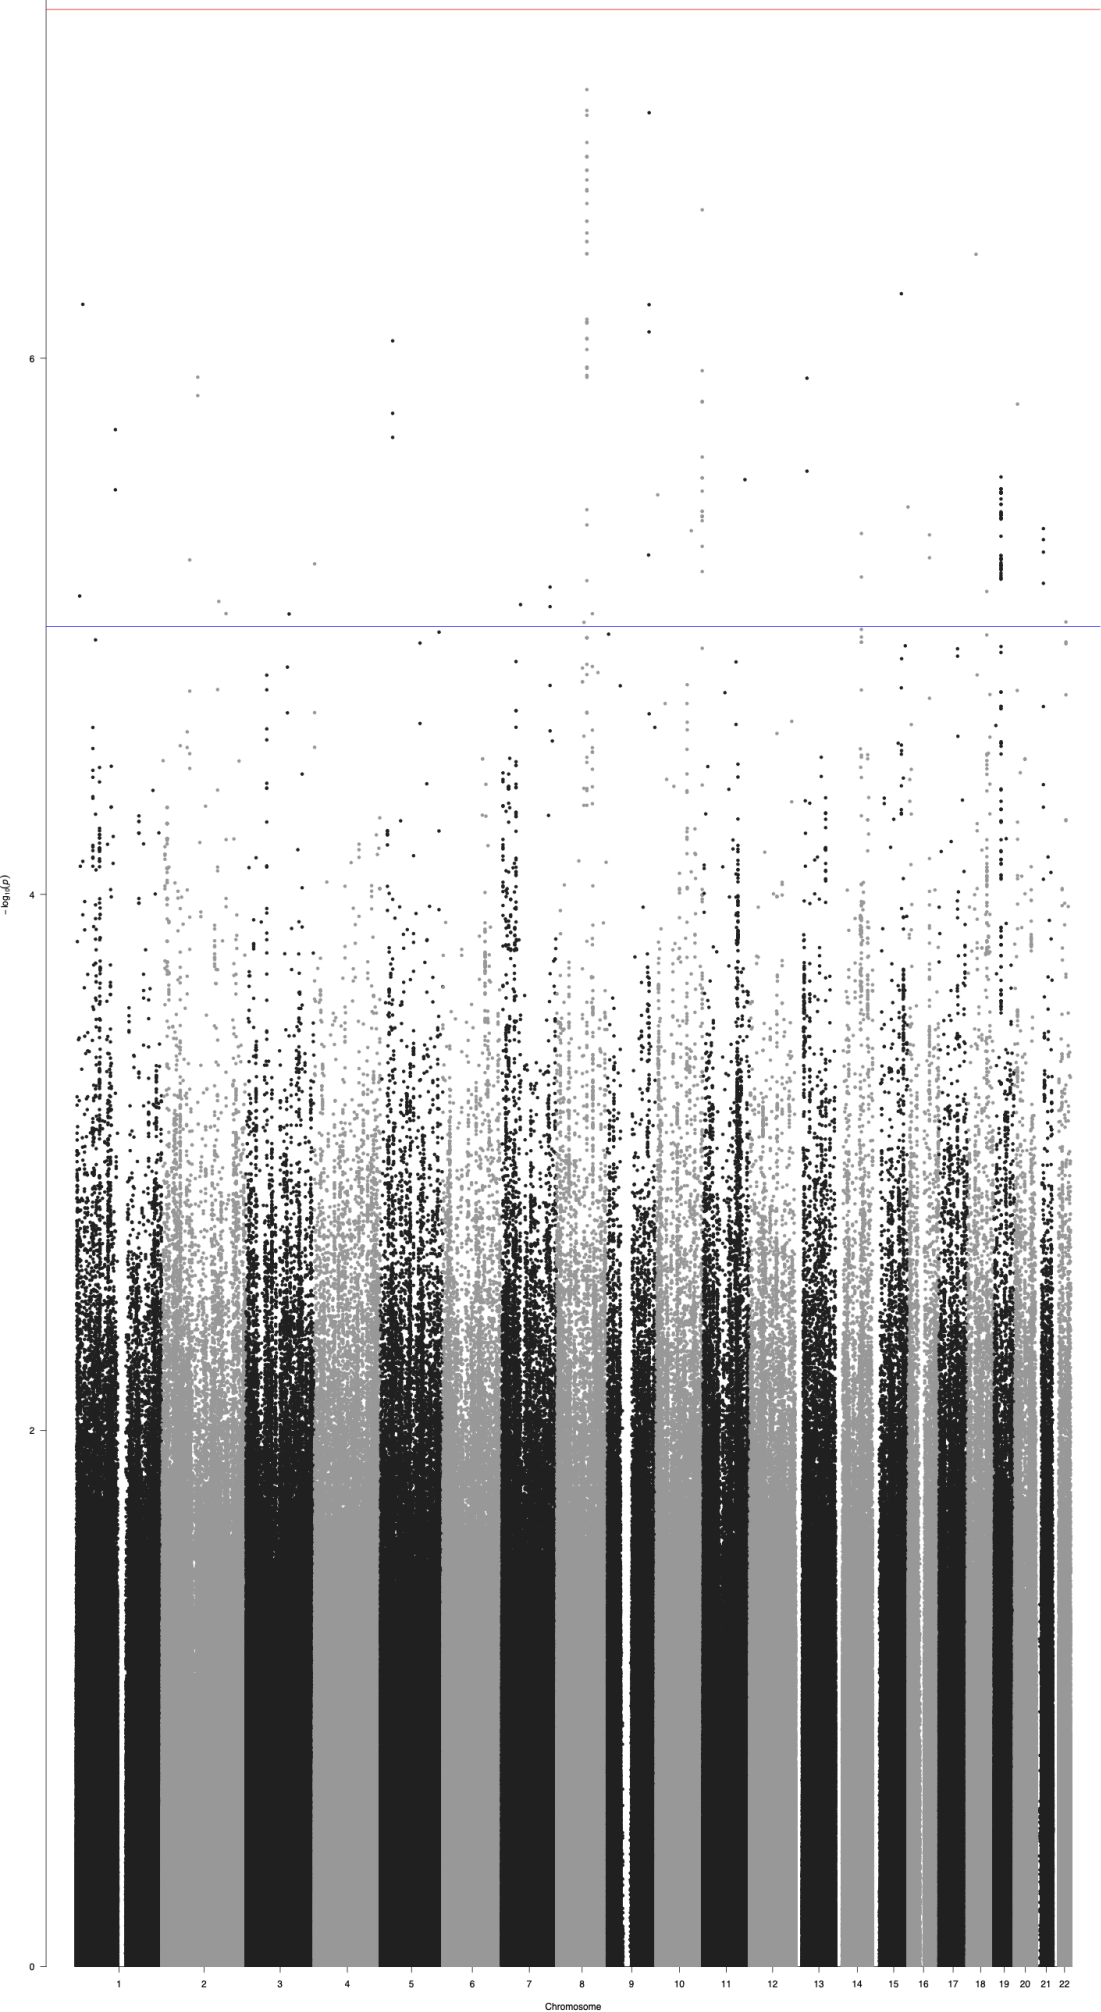

FIGURE S8. MGBB\_CHF\_qq

Note. QQ plot for coronary heart failure (CHF);  
MGBB = MassGeneral Brigham Biobank.

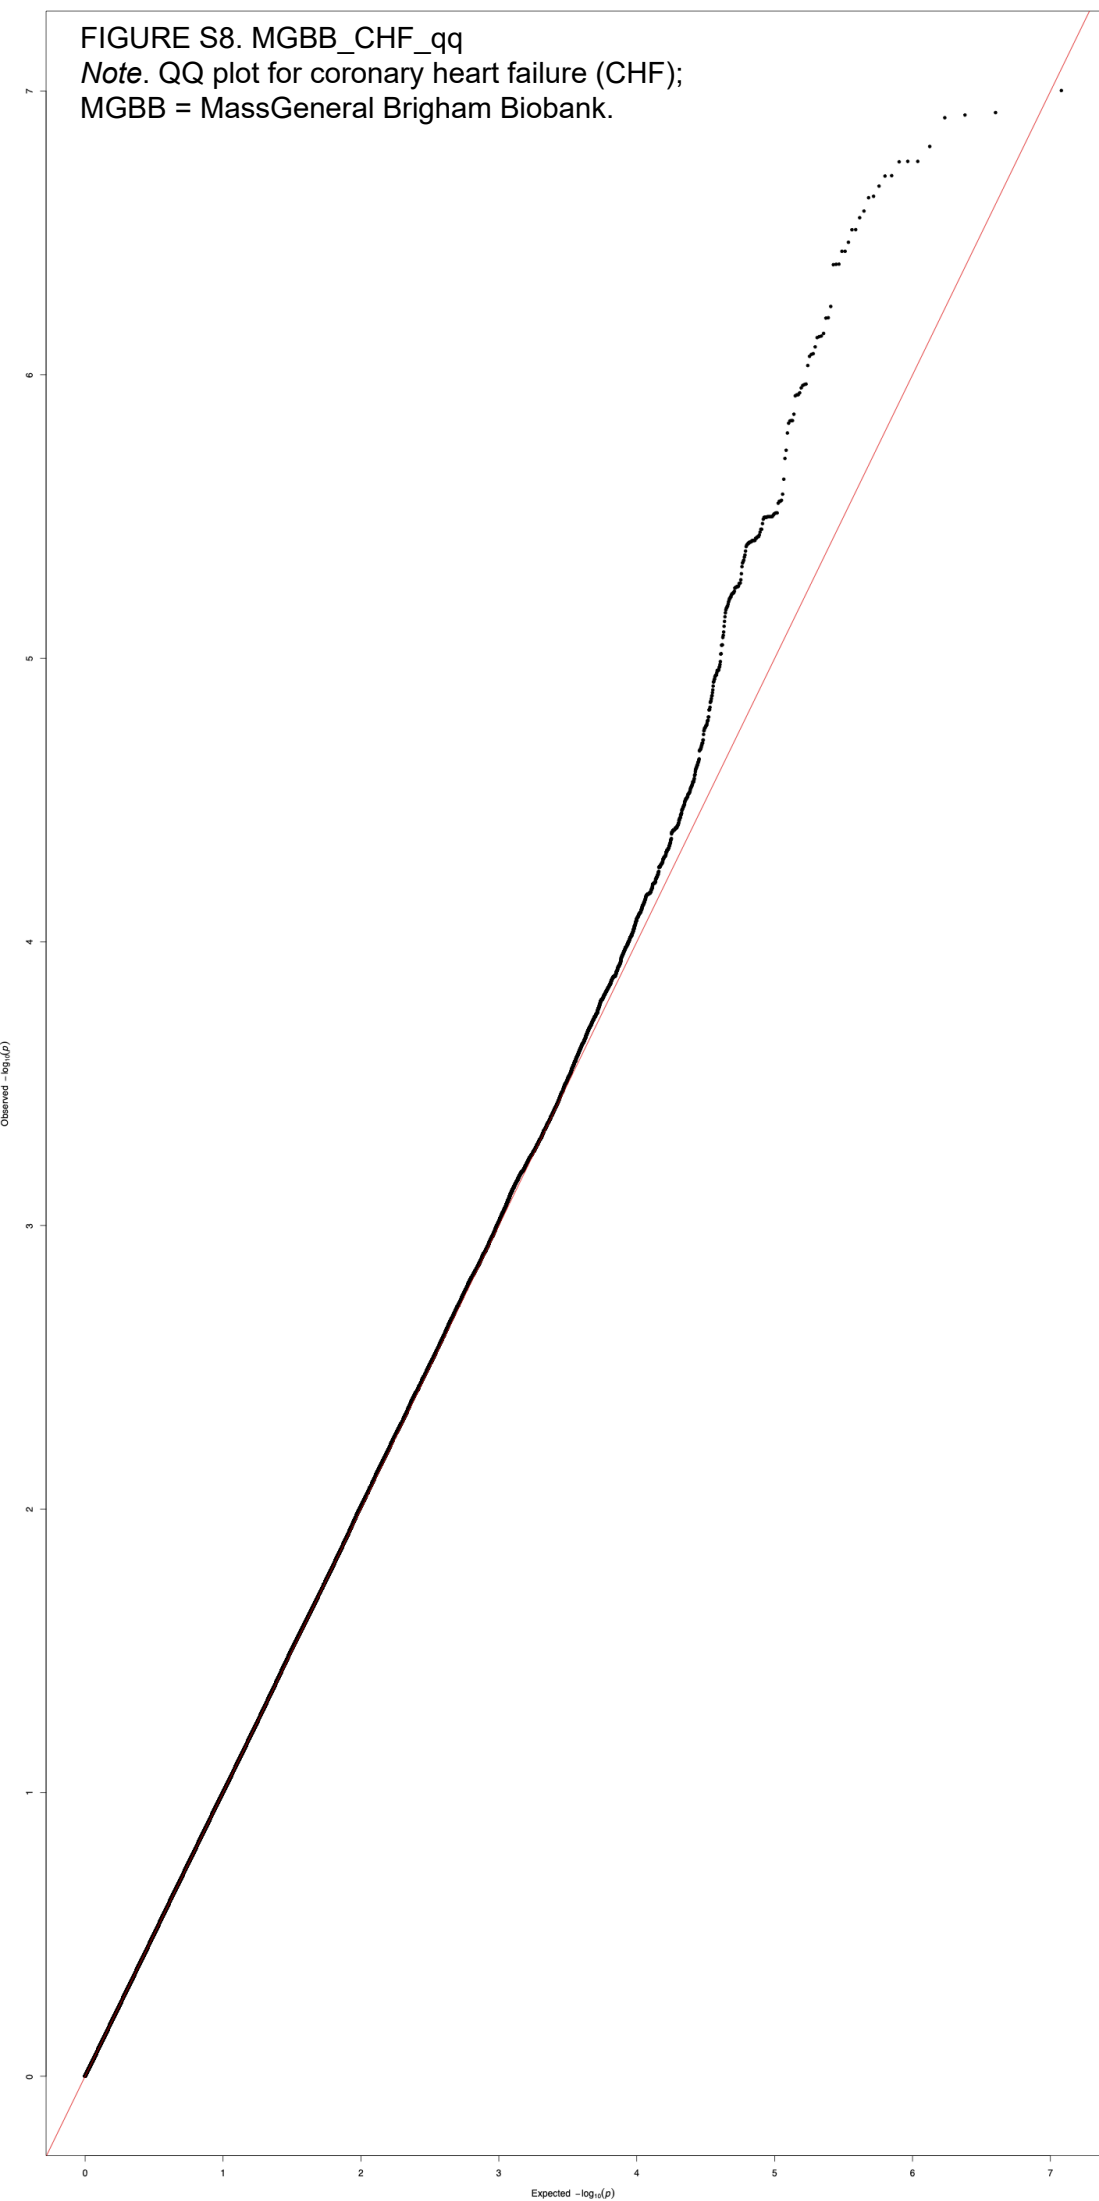

FIGURE S9. MGBB\_DiastolicAvg\_manhattan  
*Note.* Manhattan plot for Average Diastolic Blood Pressure;  
MGBB = MassGeneral Brigham Biobank.

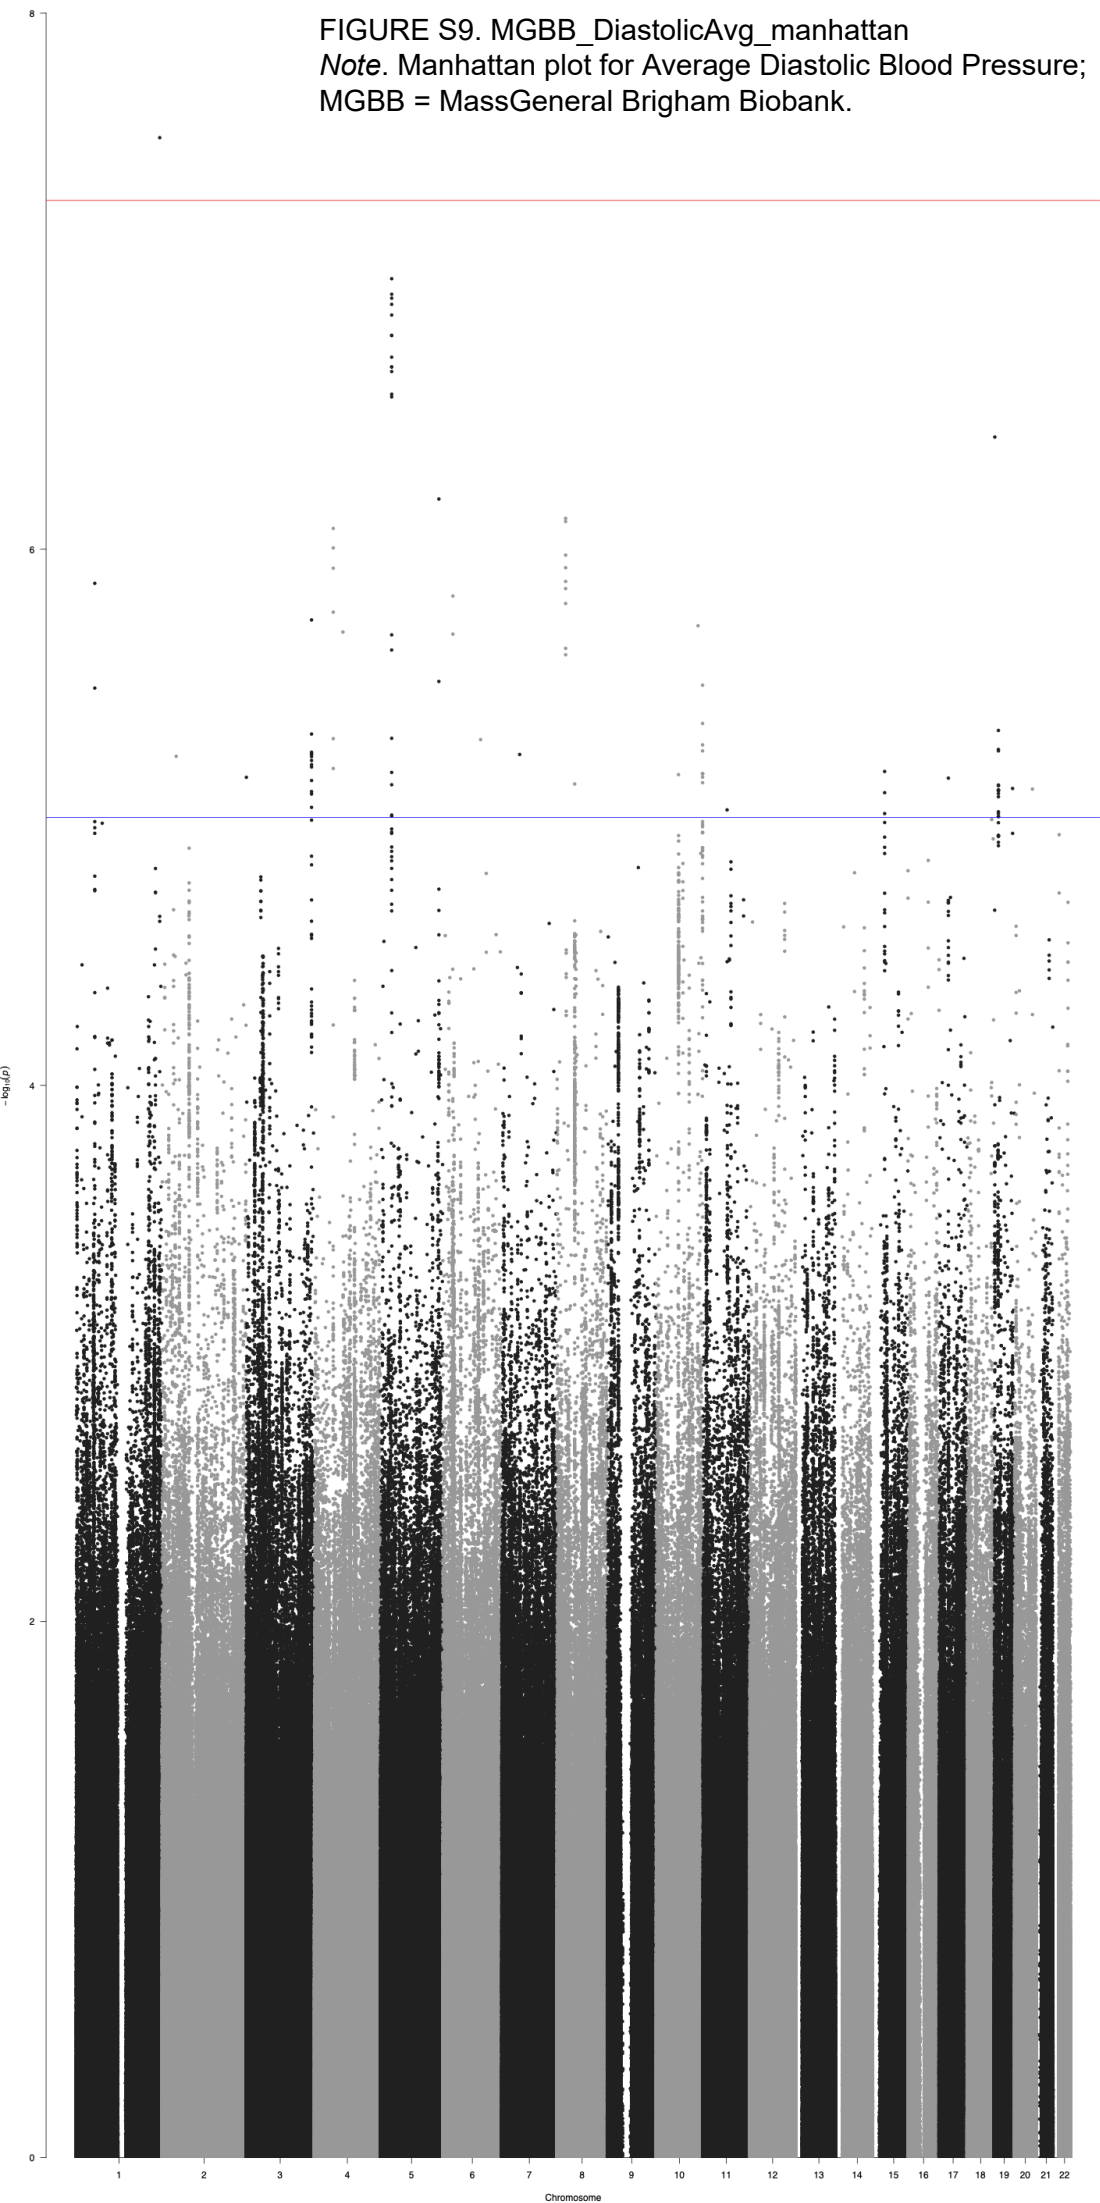

FIGURE S10. MGBB\_DiastolicAvg\_qq

Note. QQ plot for Average Diastolic Blood Pressure;  
MGBB = MassGeneral Brigham Biobank.

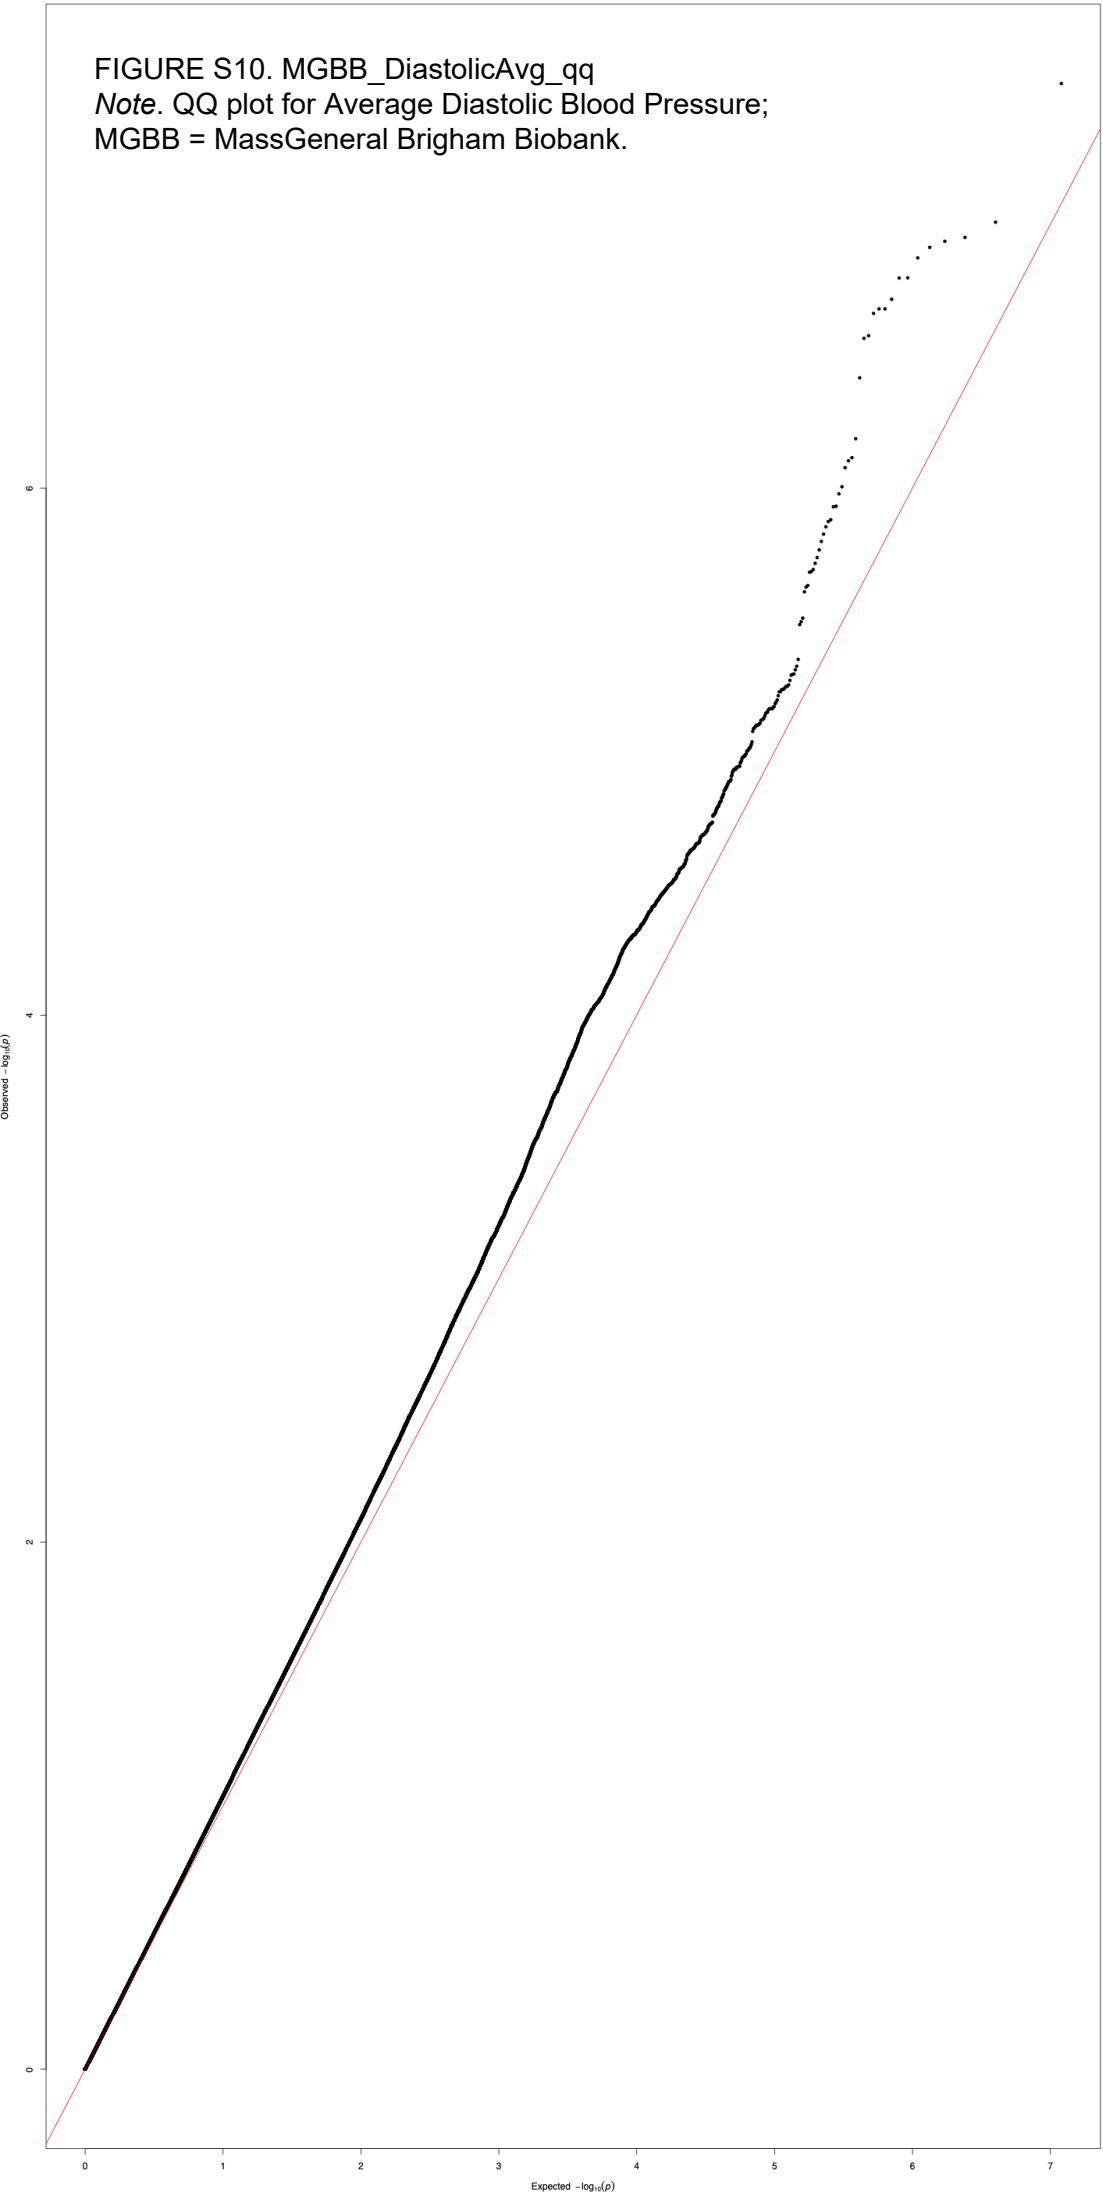

FIGURE S11. MGBB\_Hypertension\_manhattan

Note. Manhattan plot for Hypertension; MGBB = MassGeneral Brigham Biobank.

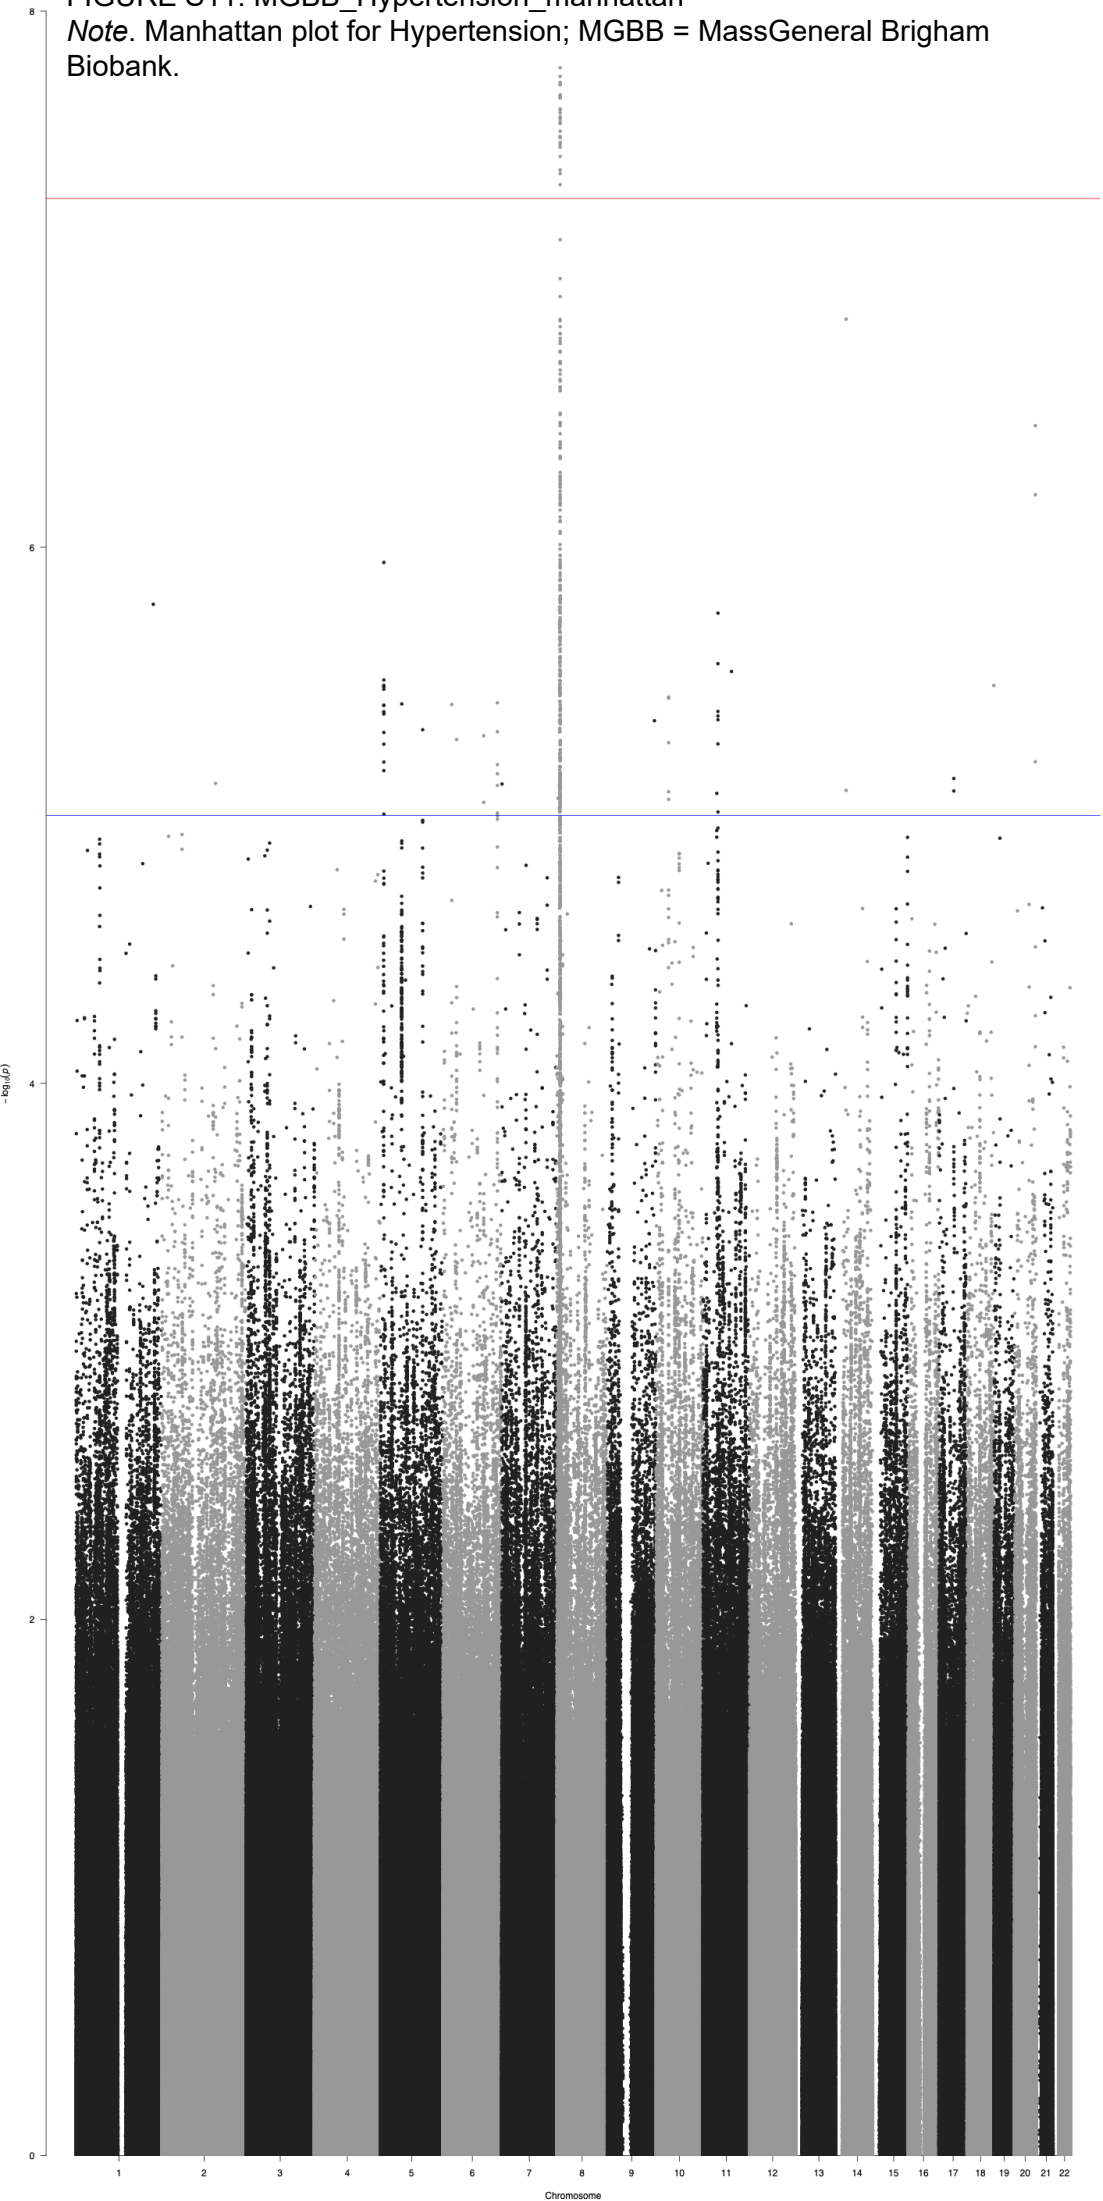

FIGURE S12. MGBB\_Hypertension\_qq  
*Note.* QQ plot for Hypertension; MGBB =  
MassGeneral Brigham Biobank.

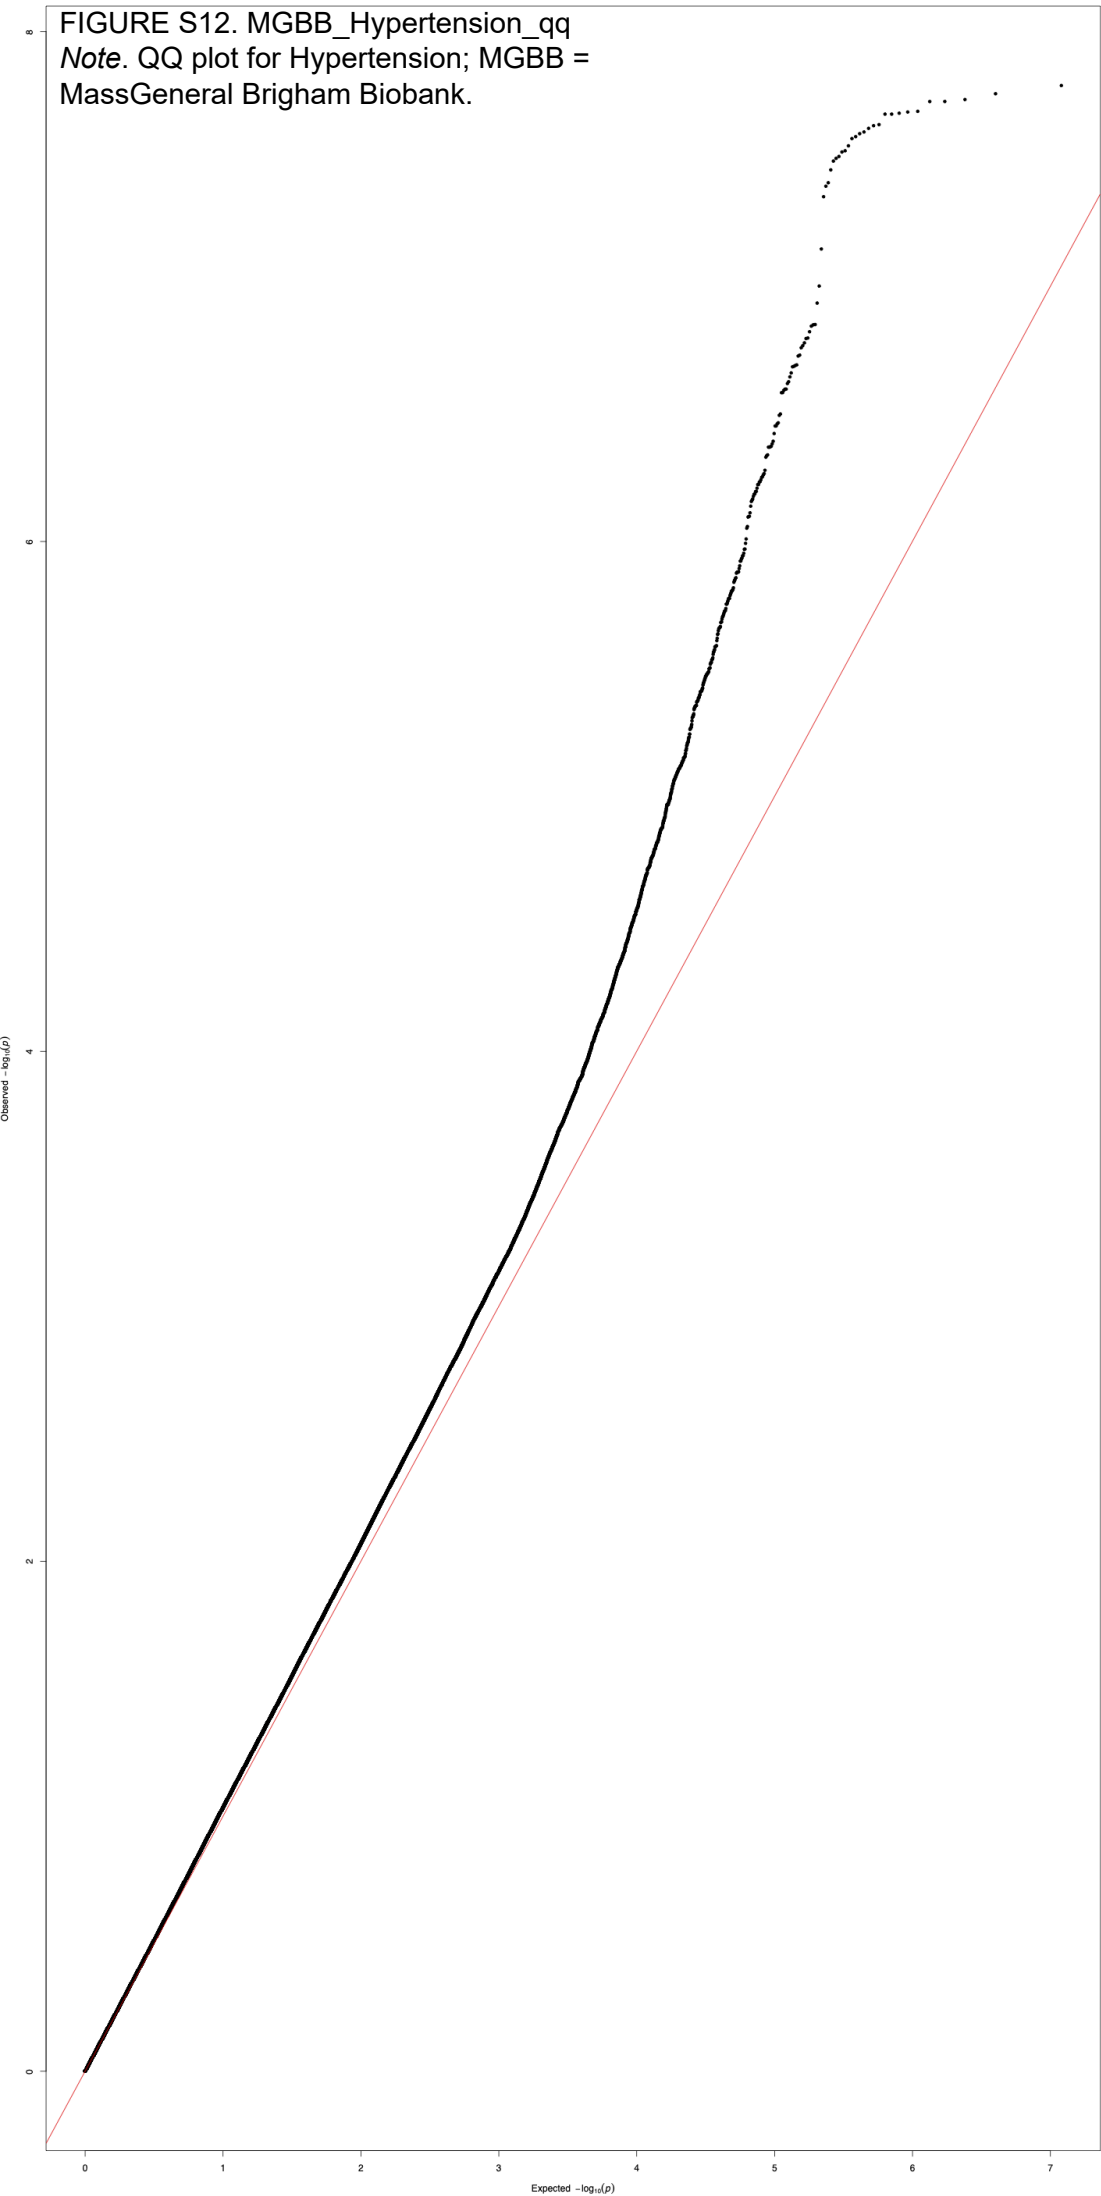



FIGURE S13. MGBB\_MDD\_manhattan

Note. Manhattan plot for Major Depressive Disorder (MDD);  
MGBB = MassGeneral Brigham Biobank.

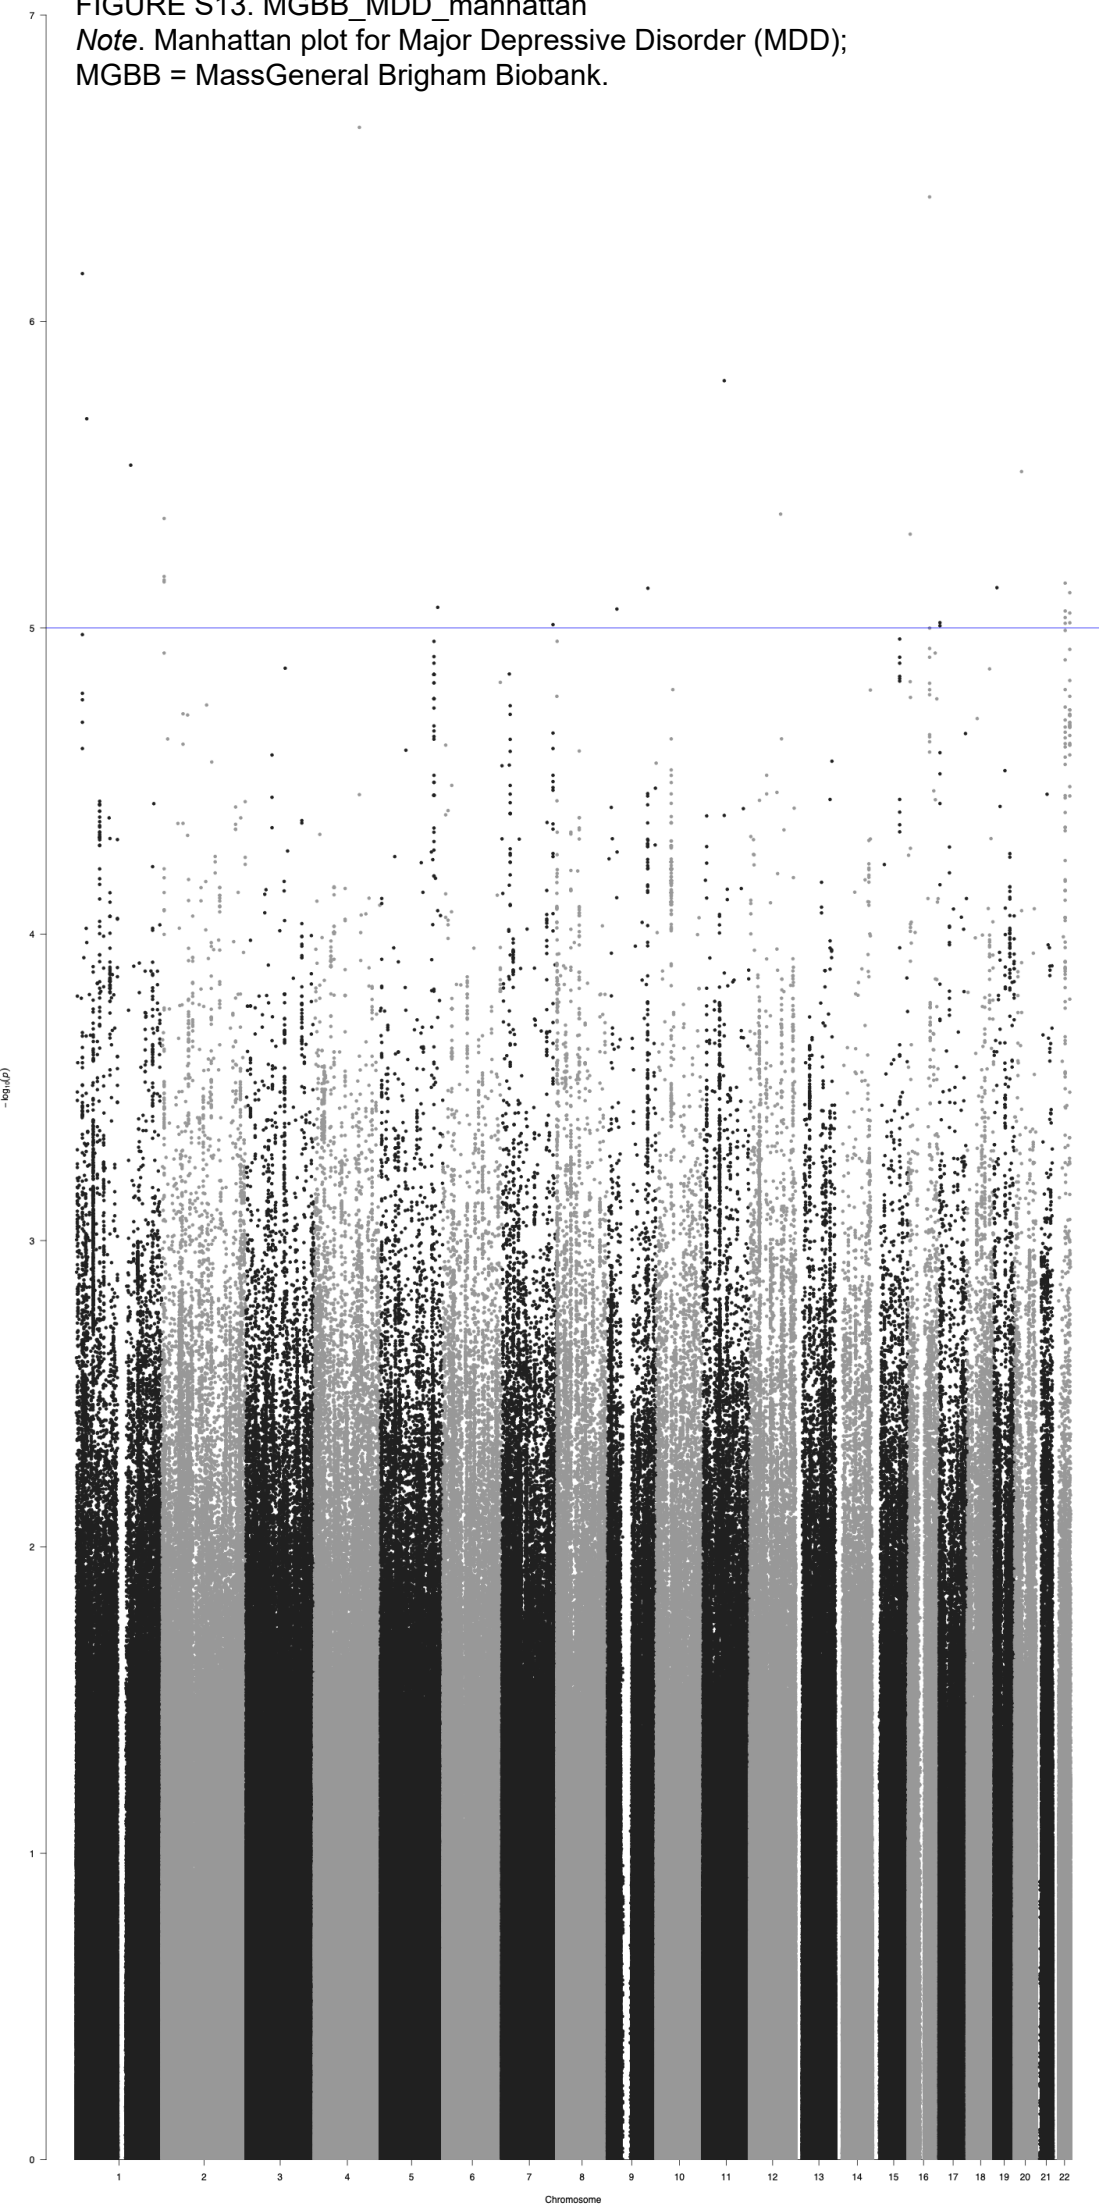

FIGURE S14. MGBB\_MDD\_qq

Note. QQ plot for Major Depressive Disorder (MDD);  
MGBB = MassGeneral Brigham Biobank.

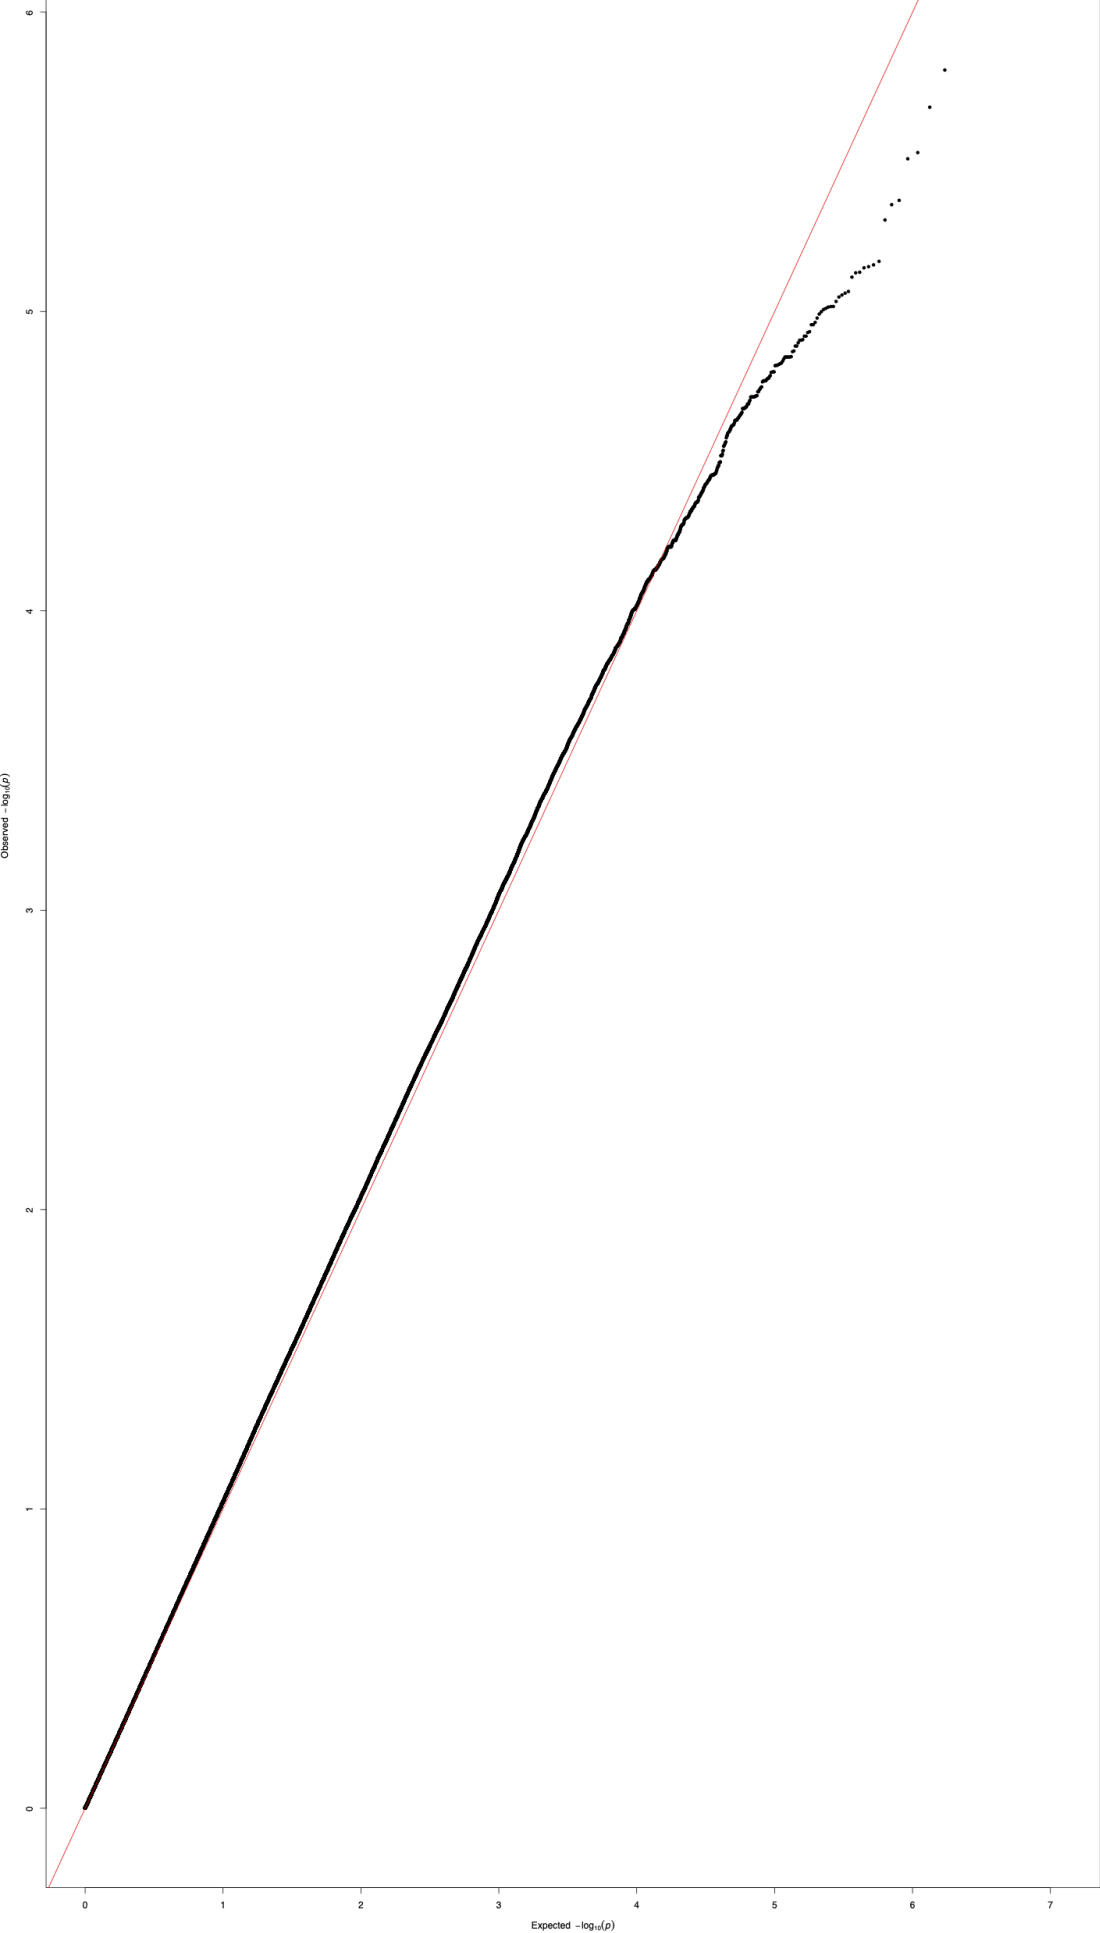

FIGURE S15. MGBB\_MI\_manhattan

Note. Manhattan plot for Myocardial Infarction (MI);  
MGBB = MassGeneral Brigham Biobank.

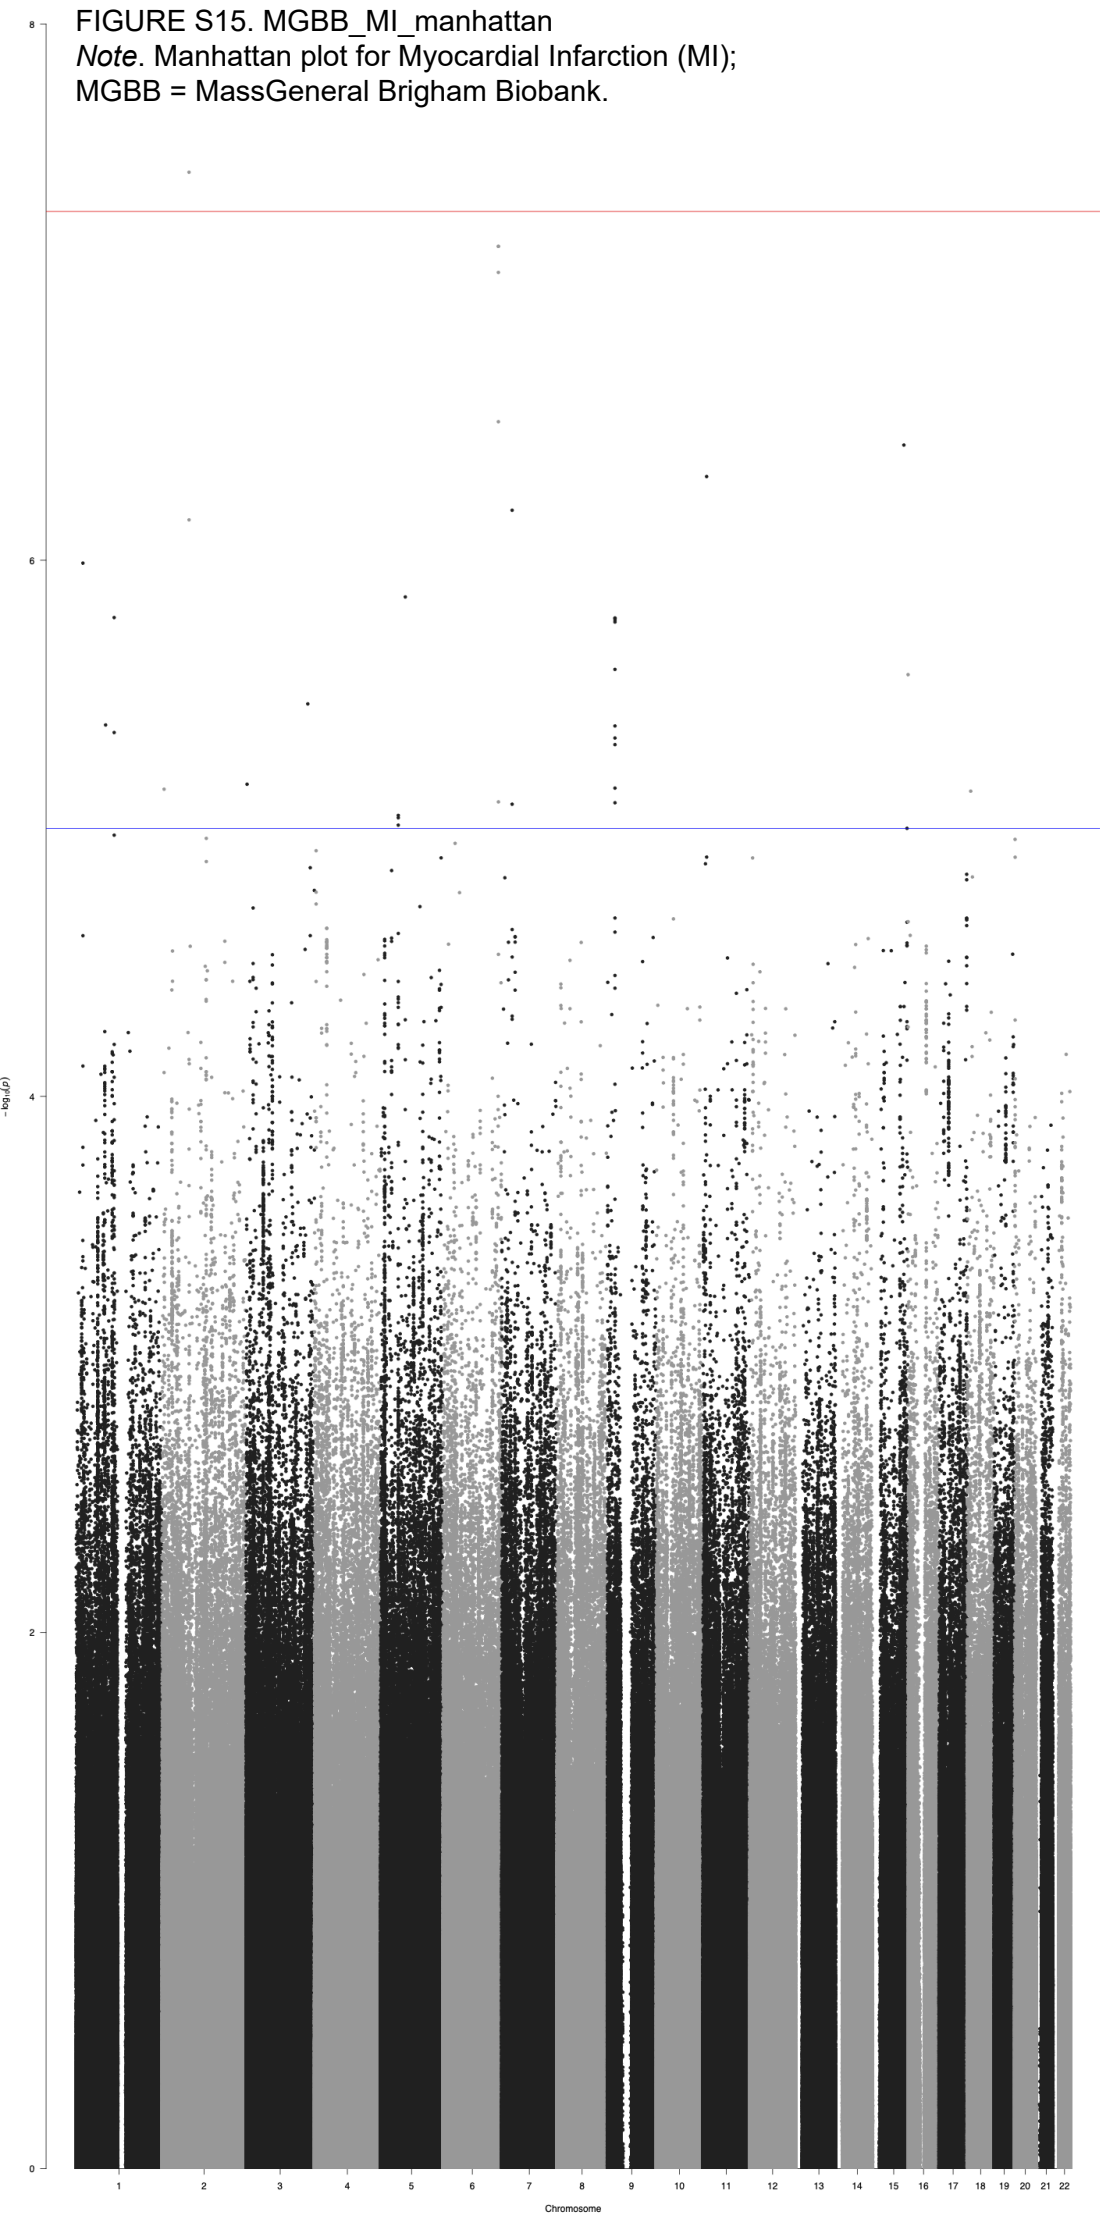

FIGURE S16. MGBB\_MI\_qq

Note. QQ plot for Myocardial Infarction (MI);  
MGBB = MassGeneral Brigham Biobank.

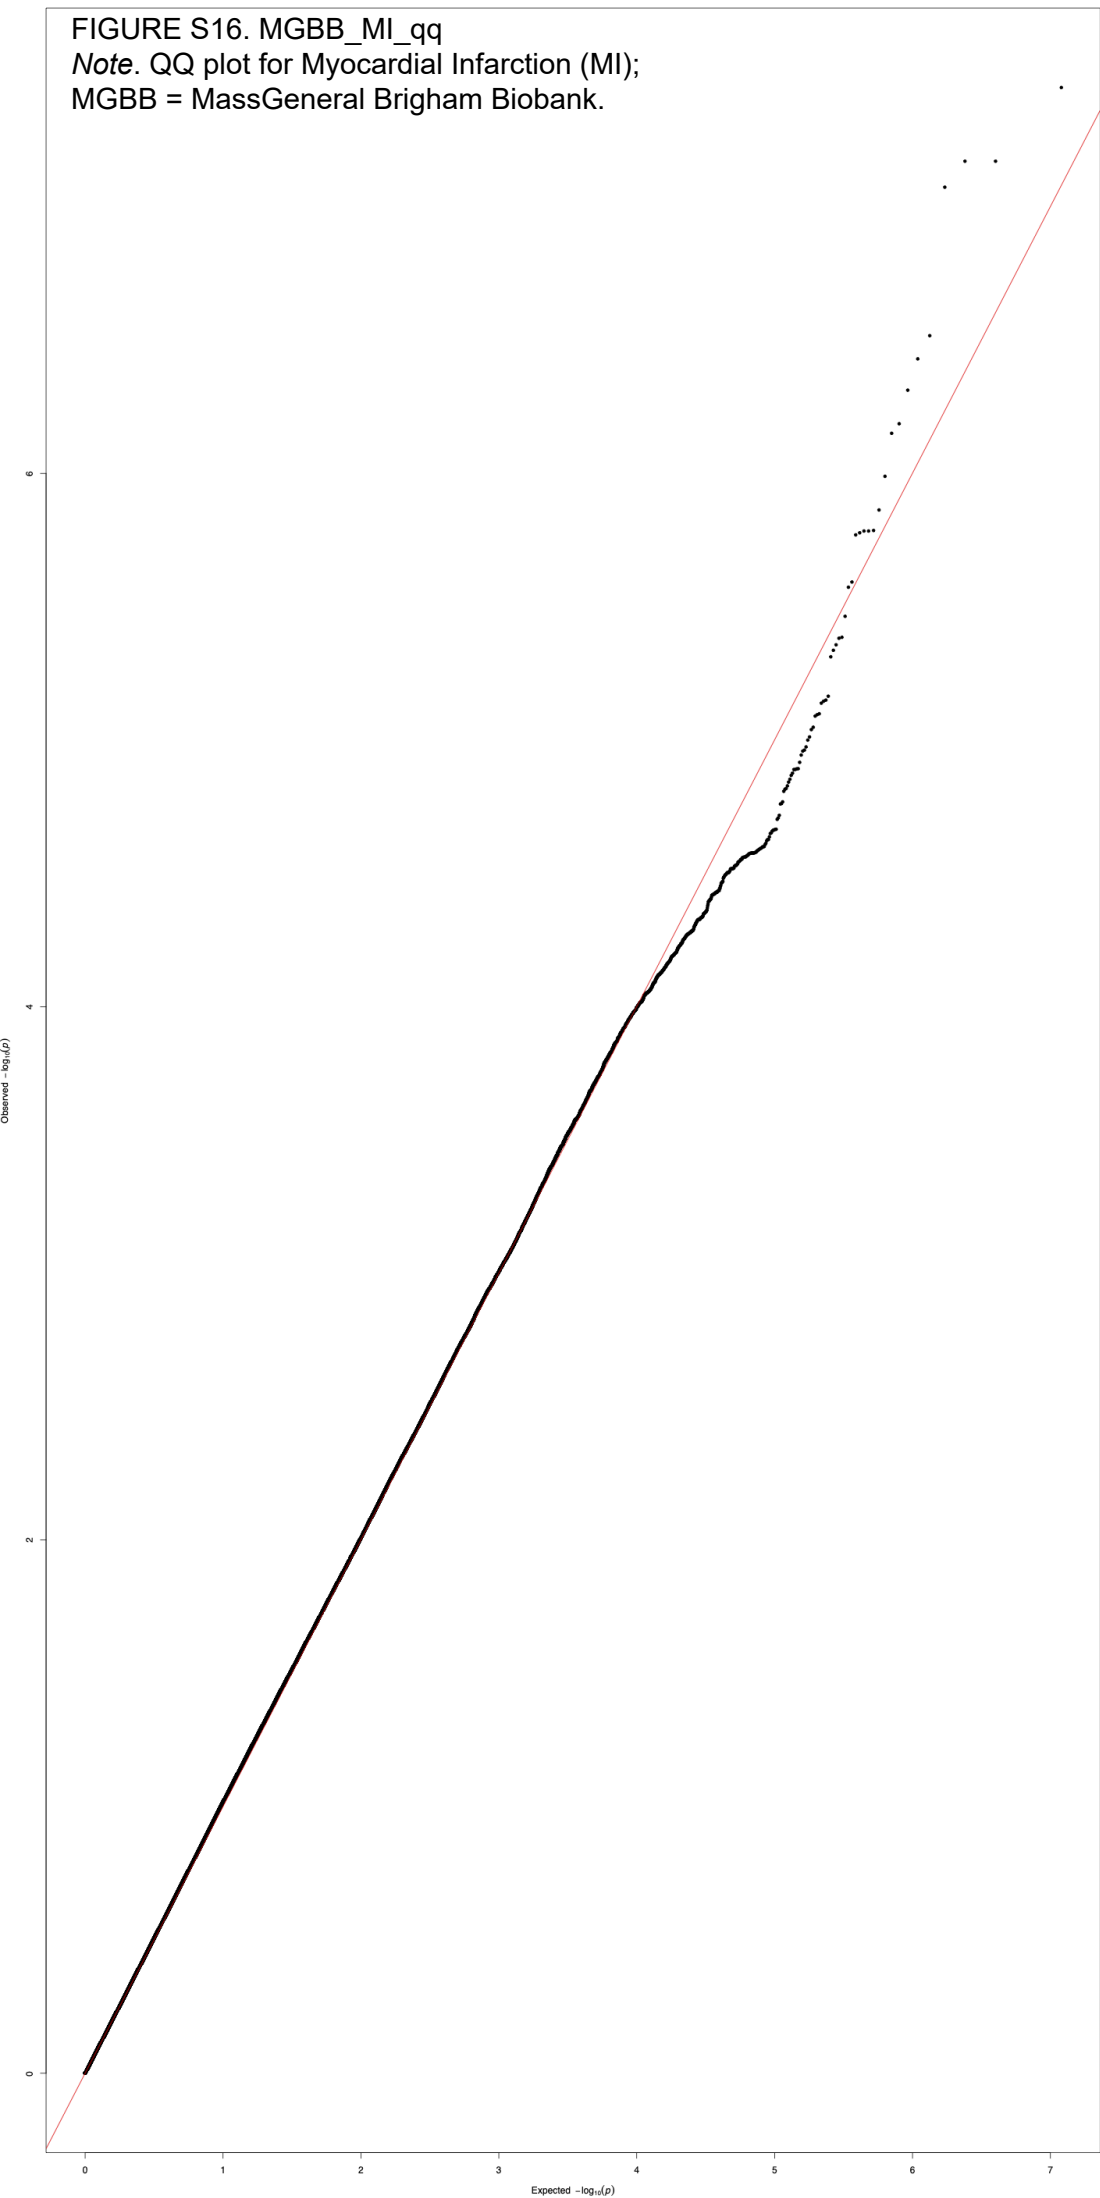

FIGURE S17. MGBB\_PTSD\_manhattan

Note. Manhattan plot for PTSD; MGBB = MassGeneral Brigham Biobank.

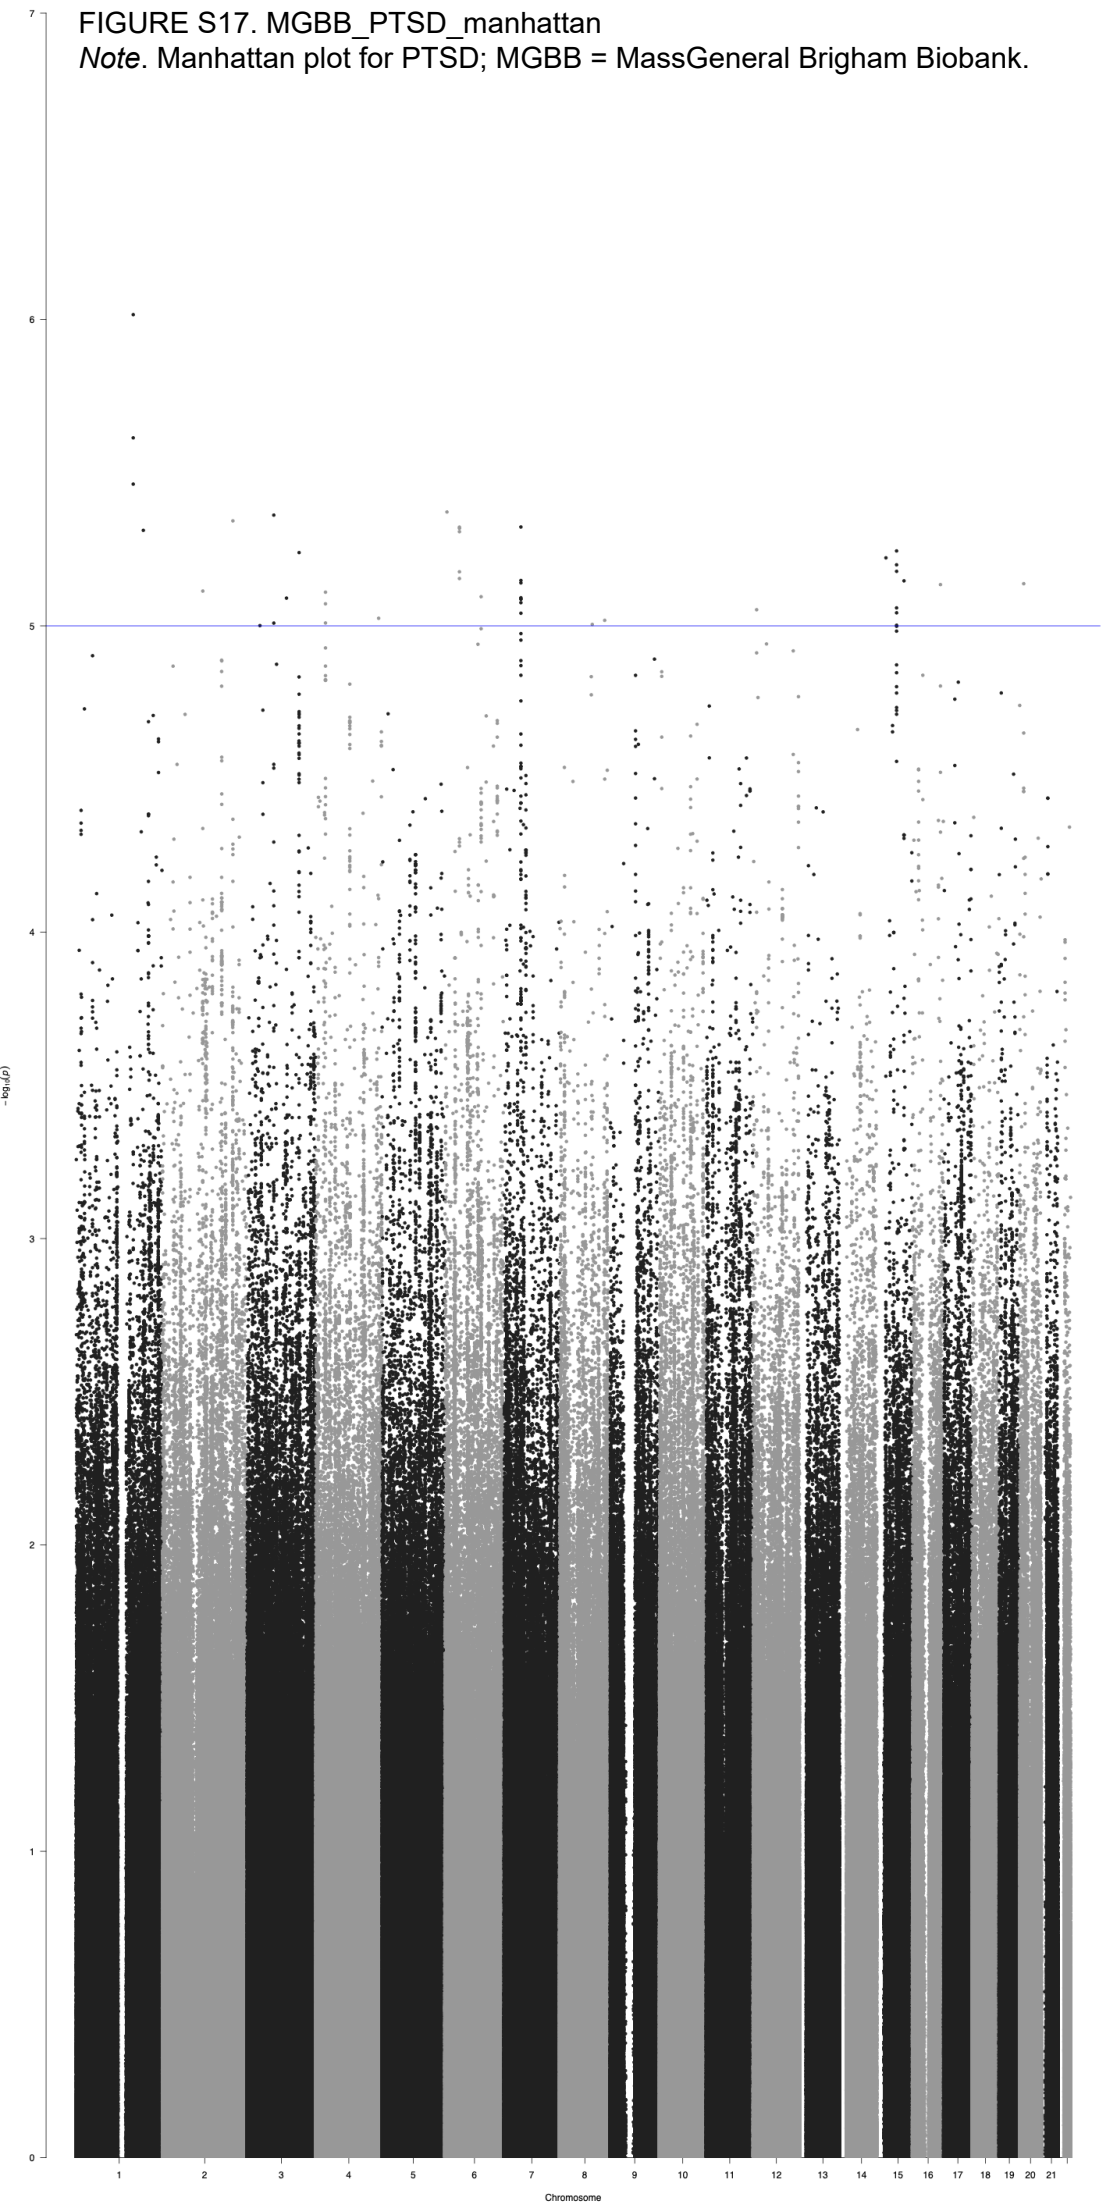

FIGURE S18. MGBB\_PTSD\_qq  
*Note.* QQ plot for PTSD; MGBB = MassGeneral  
Brigham Biobank.

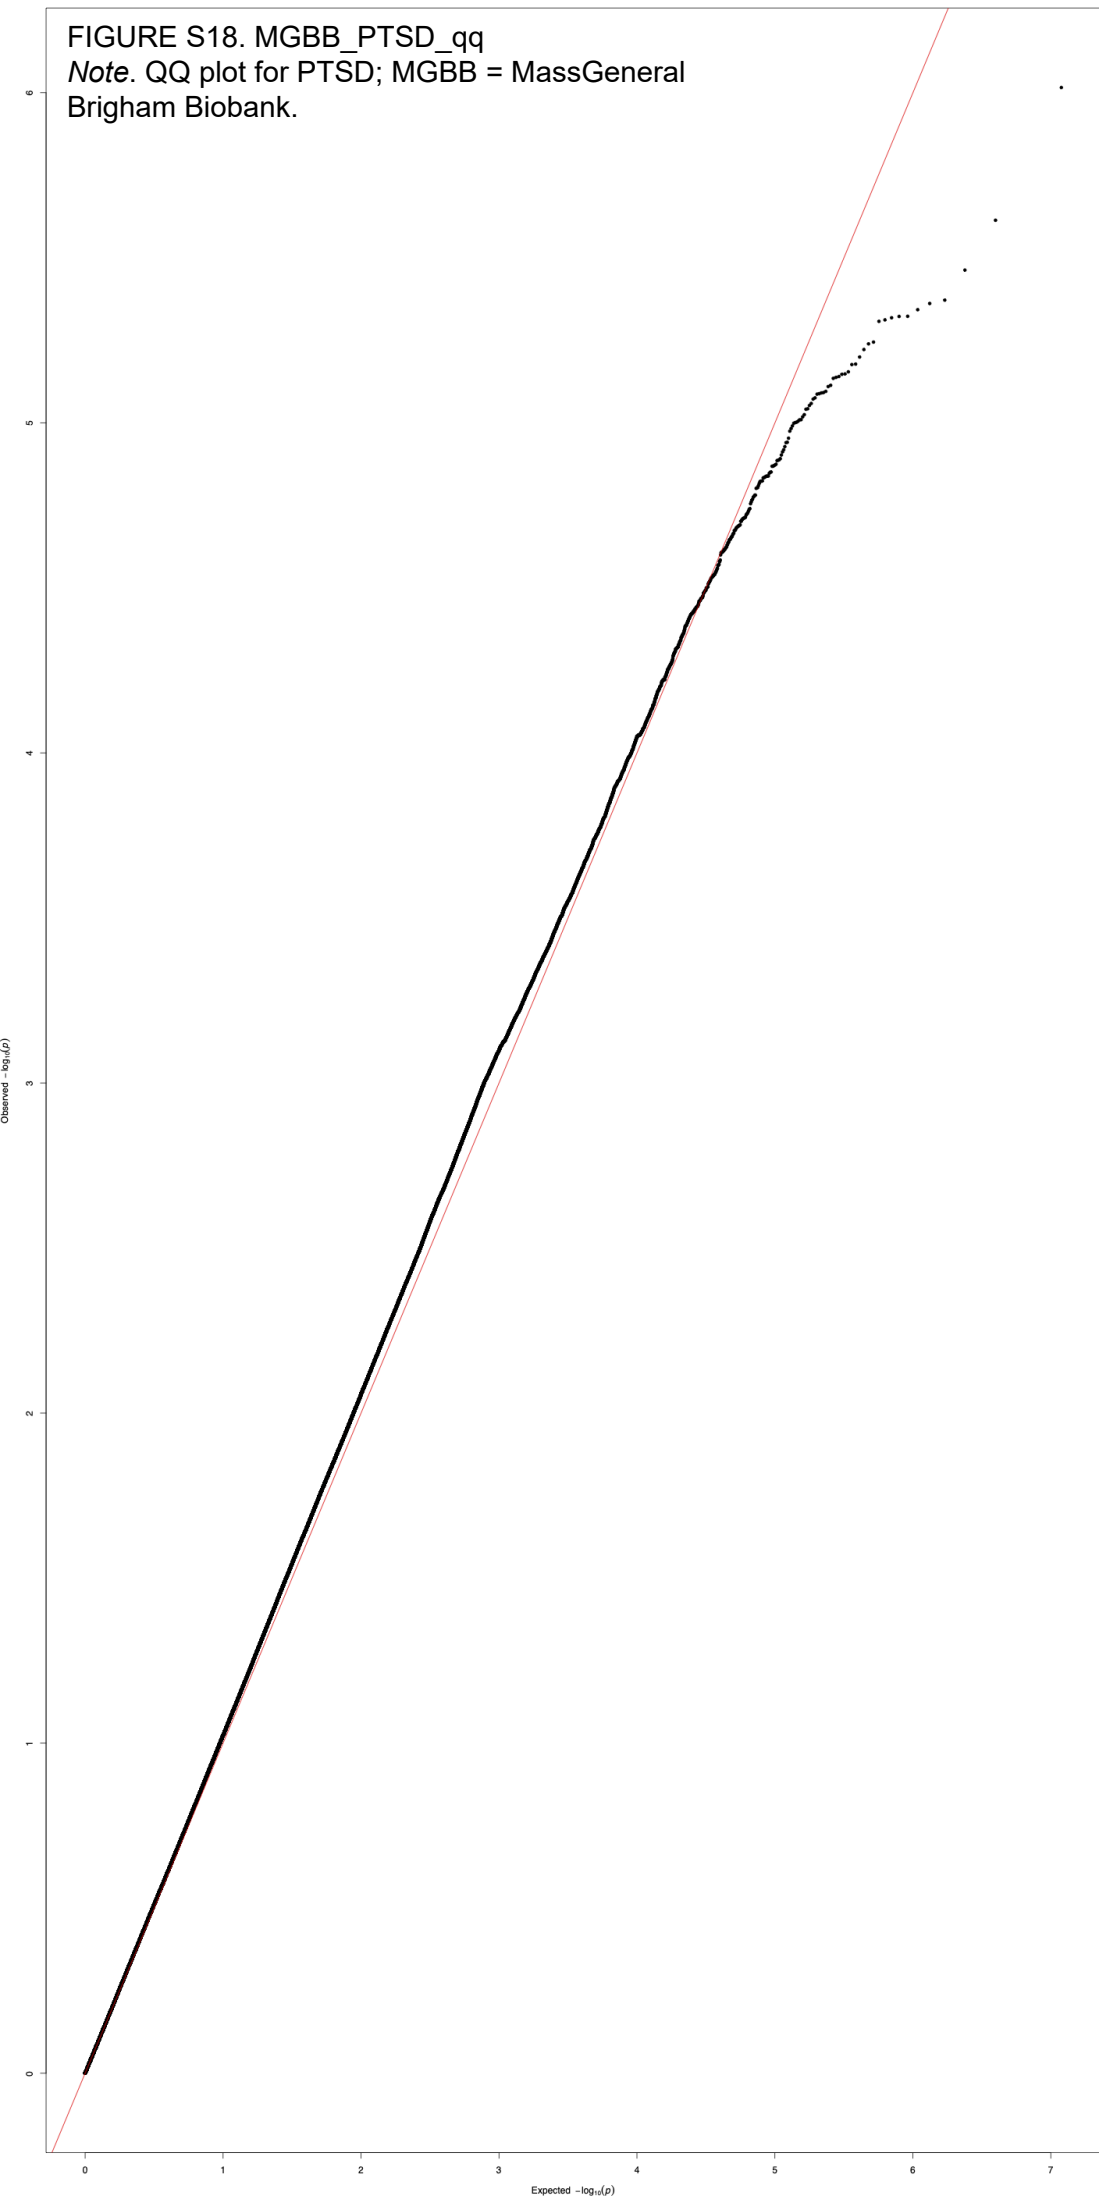

FIGURE S19. MGBB\_PulseAvg\_manhattan  
Note. Manhattan plot for Average Pulse;  
MGBB = MassGeneral Brigham Biobank.

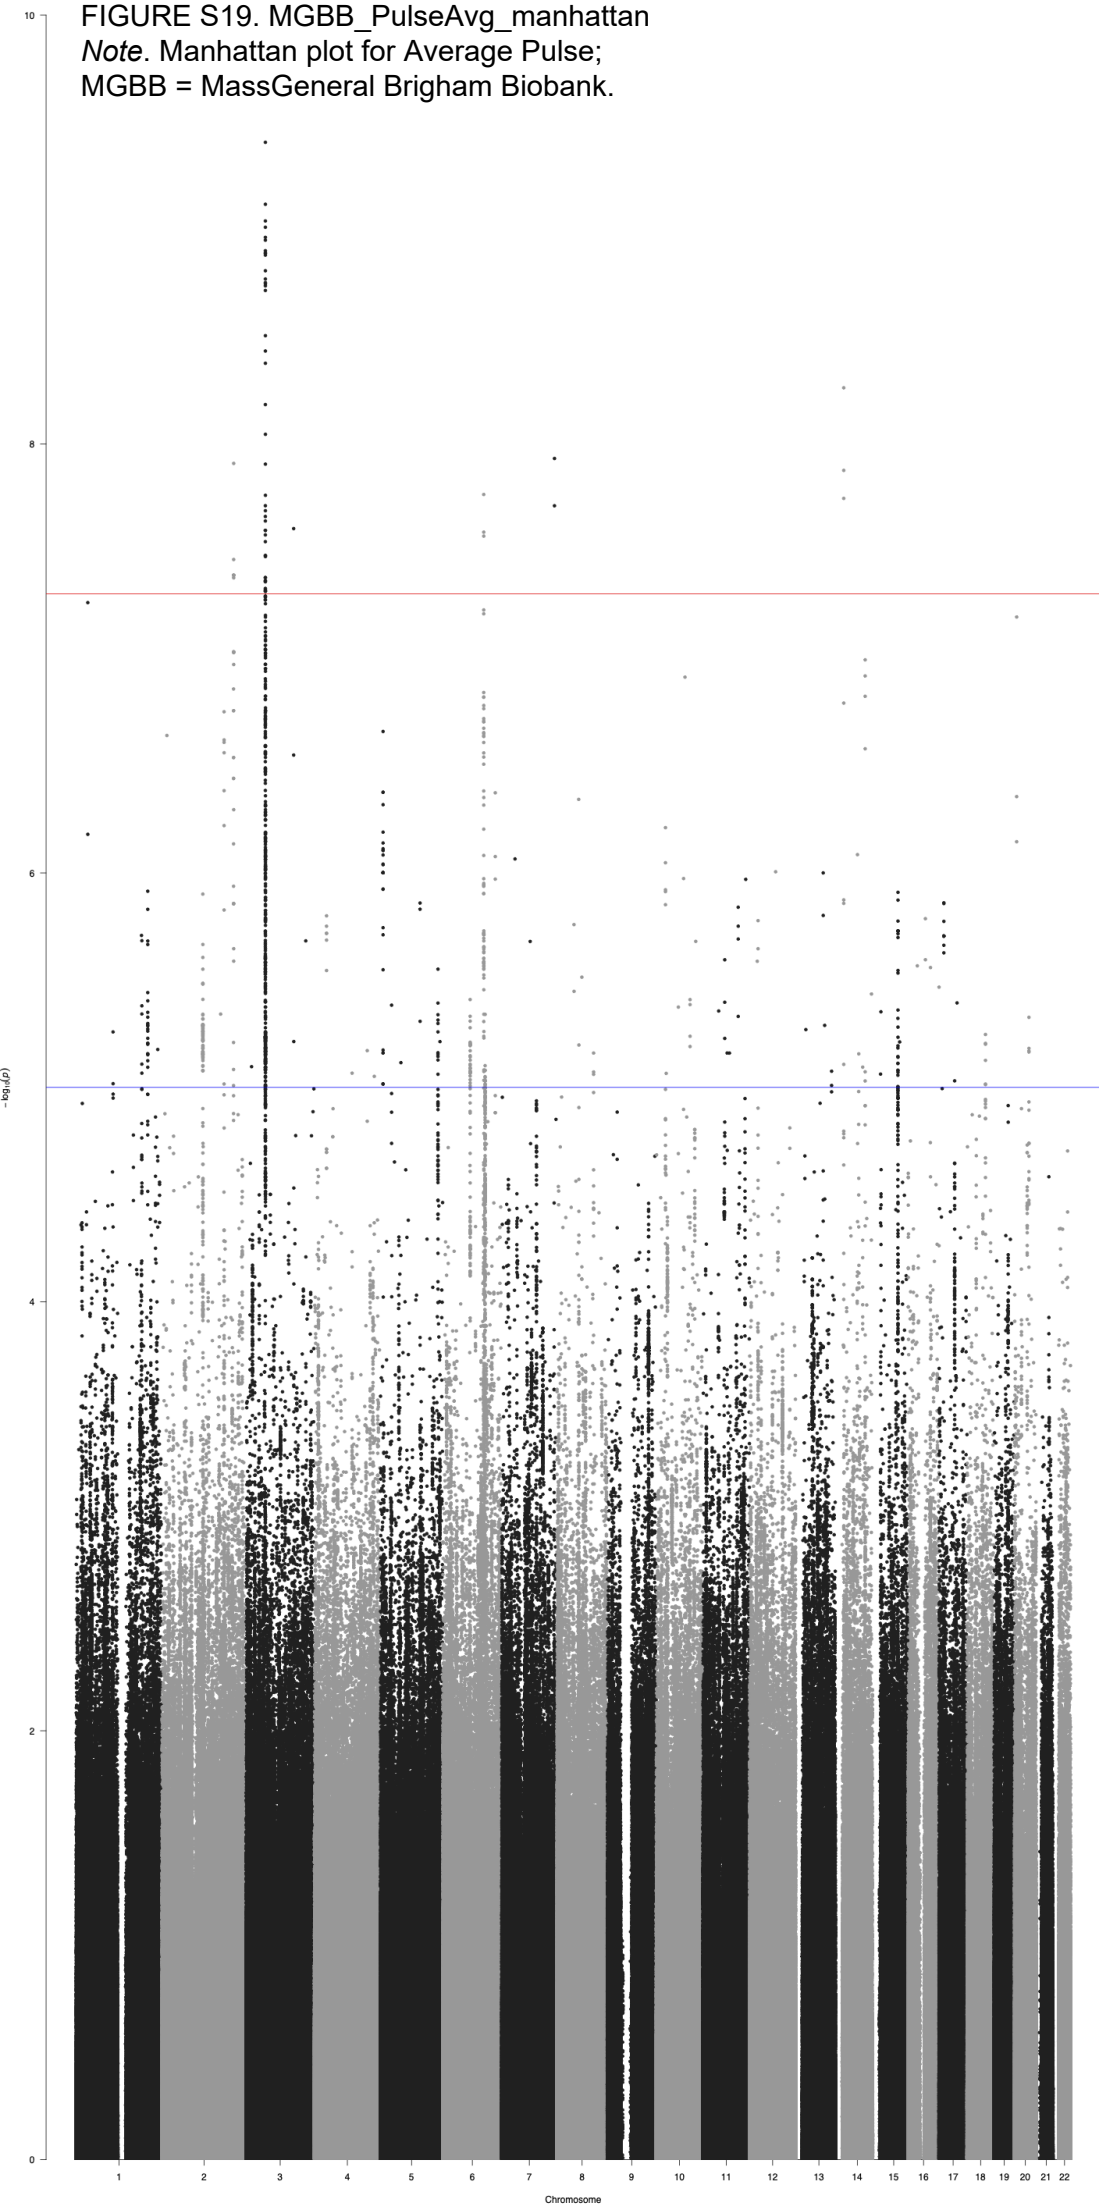

FIGURE S20. MGBB\_PulseAvg\_qq  
Note. QQ plot for Average Pulse; MGBB =  
MassGeneral Brigham Biobank.

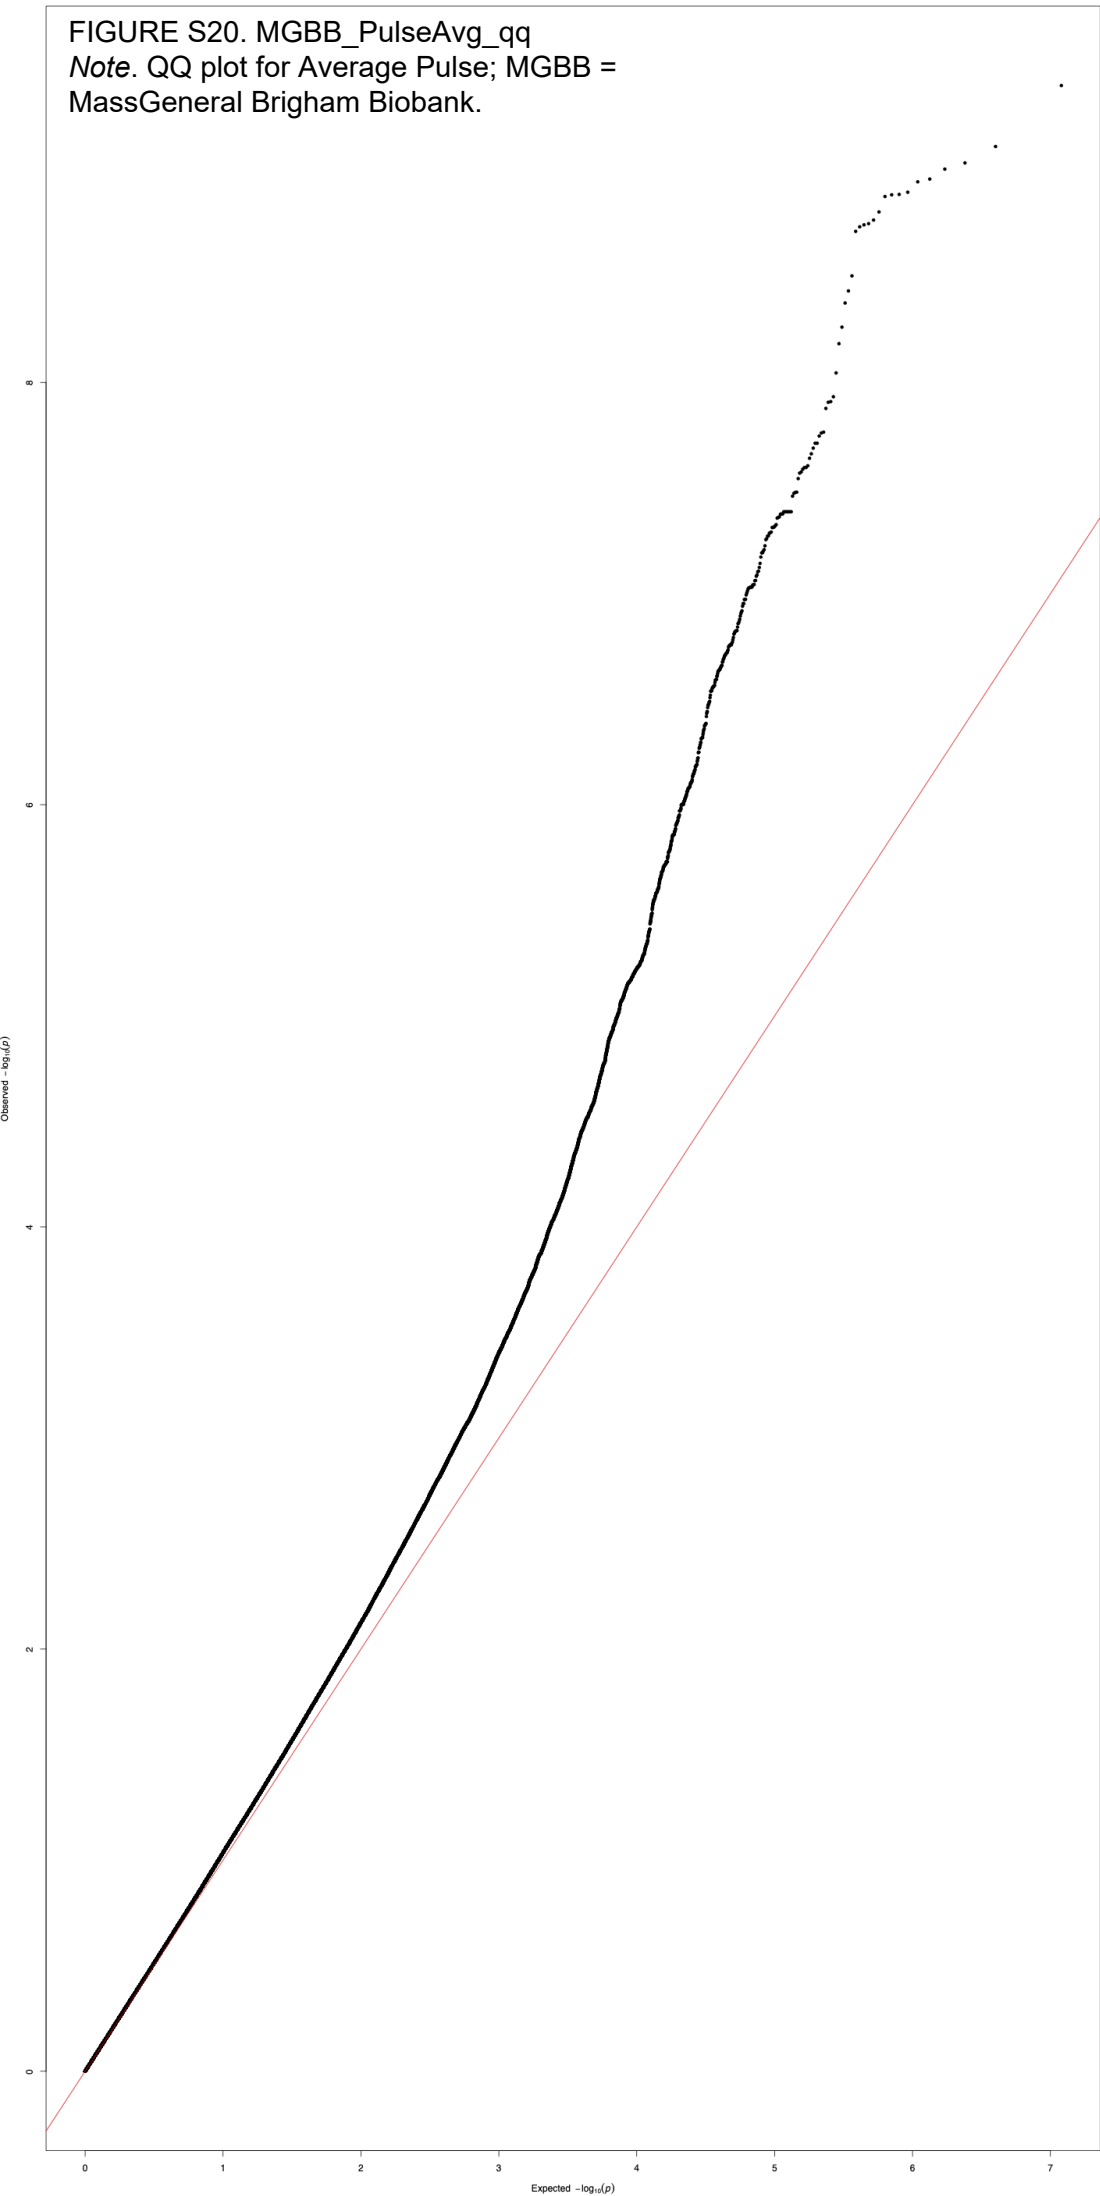



FIGURE S21. MGBB\_SystolicAvg\_manhattan

Note. Manhattan plot for Average Systolic Blood Pressure;  
MGBB = MassGeneral Brigham Biobank.

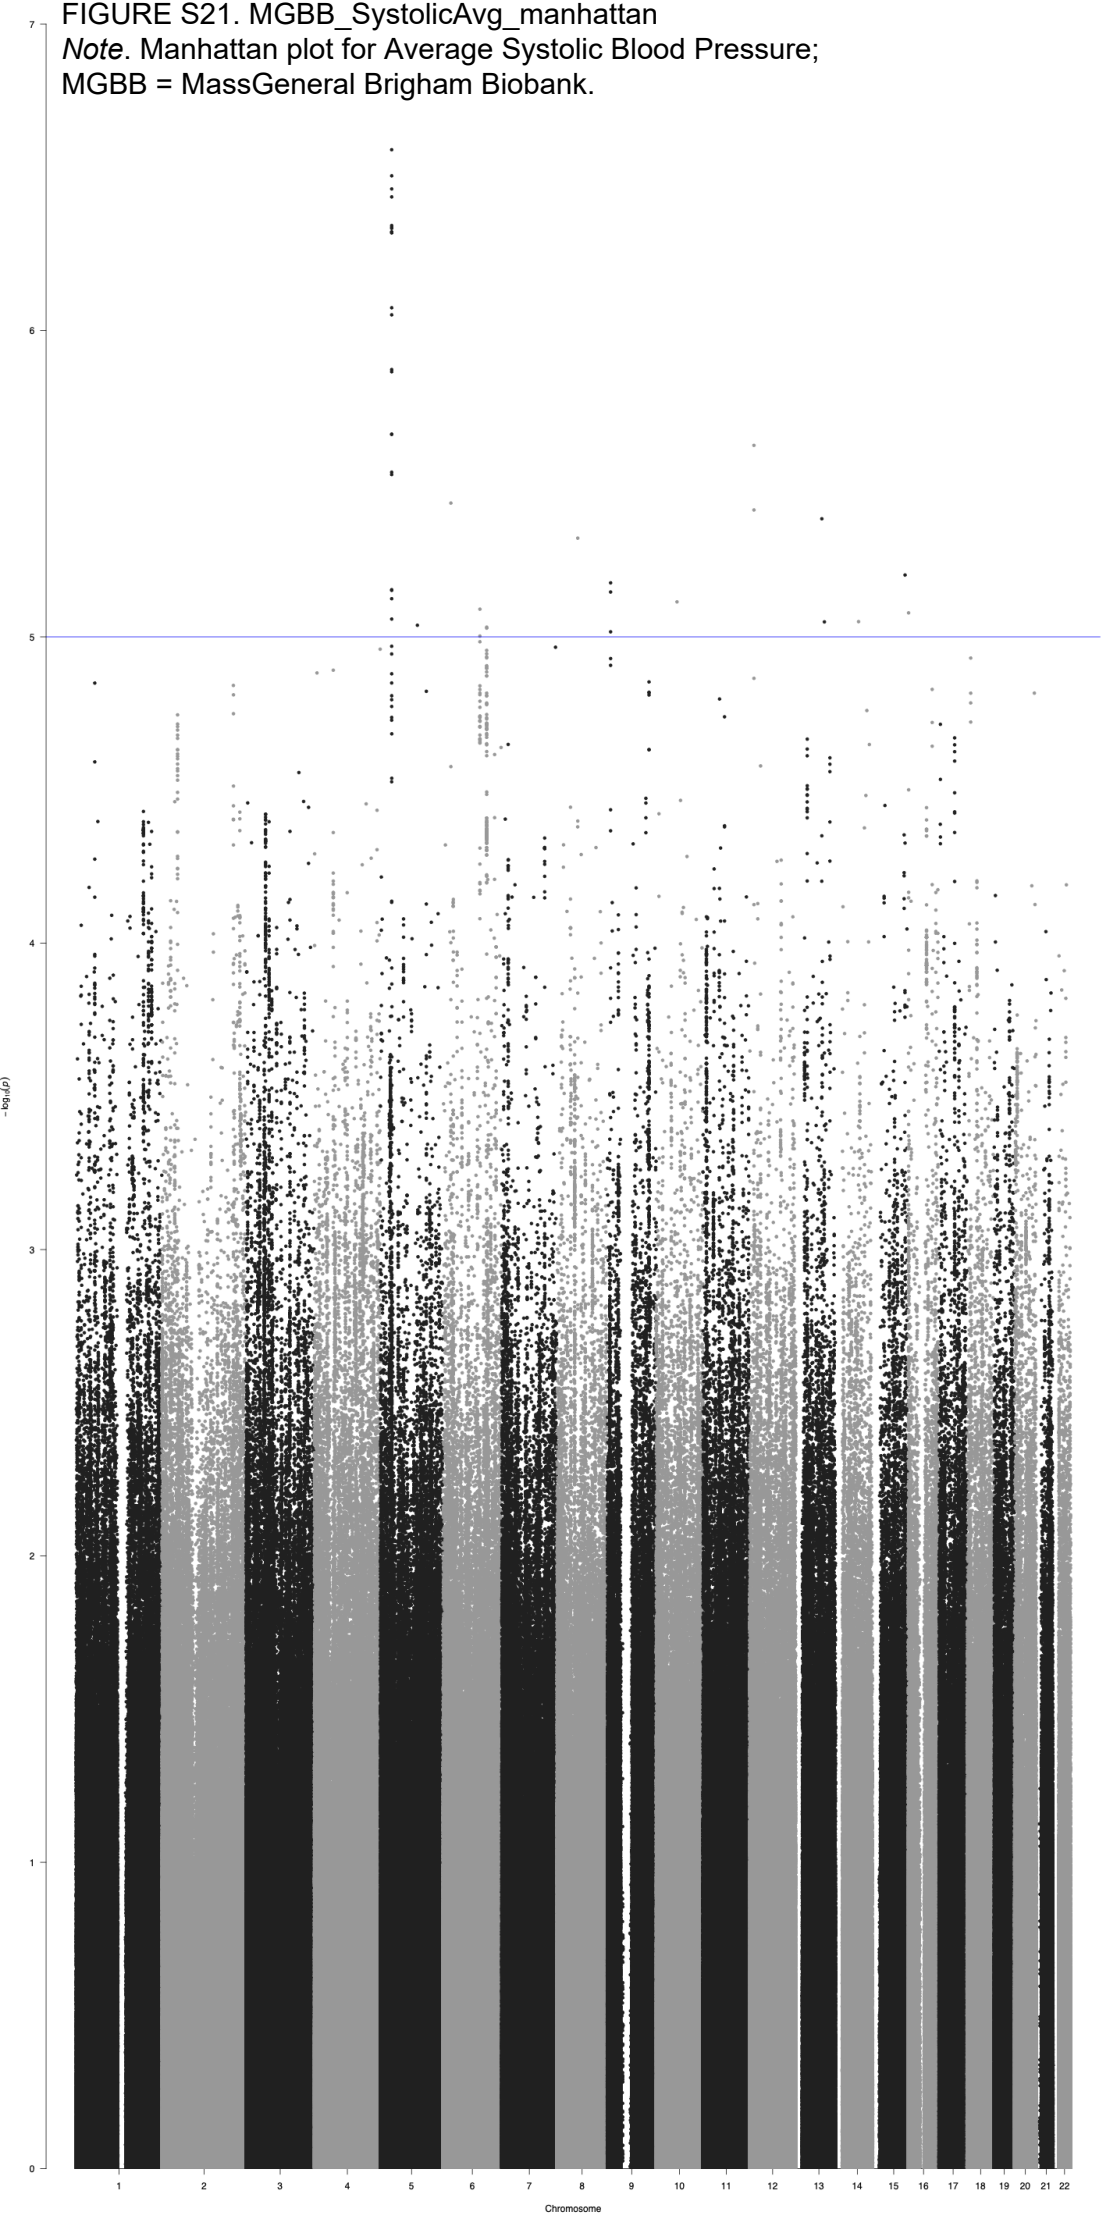

FIGURE S22. MGBB\_SystolicAvg\_qq  
Note. QQ plot for Average Systolic Blood Pressure; MGBB = MassGeneral Brigham Biobank.

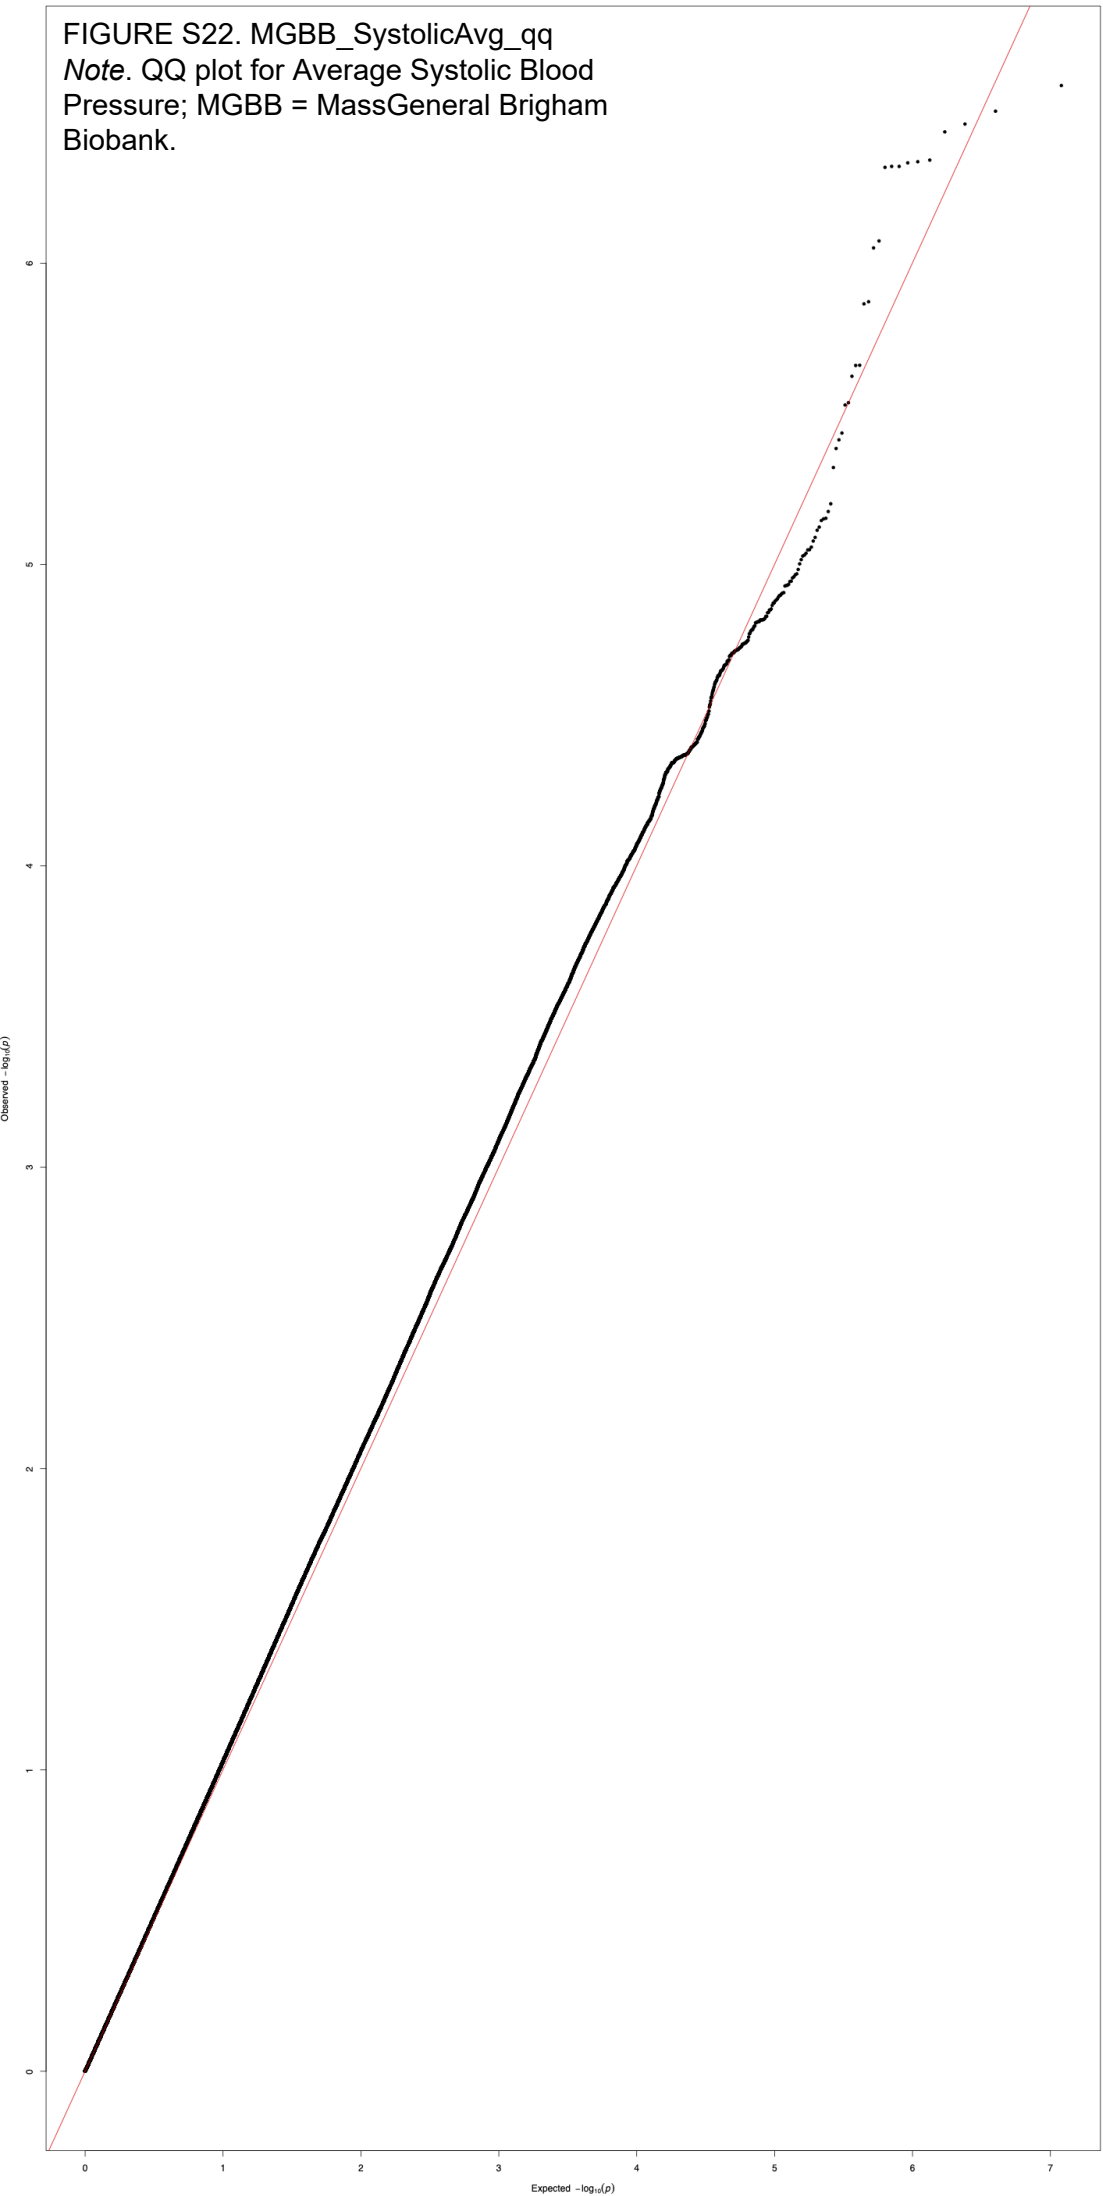

Supplement: appi.ajp.21111113.ds002.figss5-s22.pdf [file appi.ajp.21111113.ds002.figss5-s22.pdf]
