# Supplementary material for: Leveraging Large-Scale Genetics of PTSD and Cardiovascular Disease to Demonstrate Robust Shared Risk and Improve Risk Prediction Accuracy
Source: Atypon-hosted journal article supplement (doi:10.1176/appi.ajp.21111113), 2022-09-07
Supplement: appi.ajp.21111113.ds001.pdf [file appi.ajp.21111113.ds001.pdf]

Data supplement for Seligowski et al., Leveraging Large-Scale Genetics of PTSD and Cardiovascular Disease to Demonstrate Robust Shared Risk and Improve Risk Prediction Accuracy. Am J Psychiatry (doi: 10.1176/appi.ajp.21111113)

## Phenotype data

Diagnostic data was extracted from the MGBB and ICD-10 codes and curated disease populations were used to determine diagnosis.<sup>31,32</sup> Curated Disease Populations are collected by a validated phenotype algorithm with a positive predictive value of 0.90. These algorithms rely on coded diagnosis as well as natural language processing terms extracted from clinical narratives. Predictive features for each characterization were identified using an automated feature extraction protocol, which identifies comorbidities, symptoms, and medications. Concepts were screened based on frequency in patient clinical notes. Billing diagnosis and prescriptions were also included in algorithms.<sup>31,32</sup> Patients with lifetime history of congestive heart failure, coronary artery disease, hypertension, ischemic stroke, and depression as determined by Curated Disease Population status were considered positive for these traits in our dataset. Curated Disease Populations were not available for PTSD or myocardial infarction.

## Curated Disease Population Algorithms

Model definitions with features and betas: Below are the feature weights of the final hypertension phenotype algorithms. The weights below are used to derive a predicted probability of hypertension or no hypertension for every Biobank participant.

| Feature_ID                    | Beta (weight) | Feature Description                            |
|-------------------------------|---------------|------------------------------------------------|
| (Intercept)                   | 0.247         | Model Intercept (beta 0)                       |
| HTN_COD_DX_Hypertension       | 0.793         | Count of coded diagnosis of hypertension       |
| HTN_COD_MED_Antihypertensives | 0.627         | Count of prescriptions for an antihypertensive |

|                          |        |                                                           |
|--------------------------|--------|-----------------------------------------------------------|
| HTN_COD_MED_Aceinhibitor | 0.476  | Count of prescriptions for an ACE inhibitor               |
| max_bmi_new              | -0.323 | Maximum BMI (if missing, impute to mean sample BMI of 30) |
| patient_dxent            | -0.586 | Total number of visits with a coded diagnosis             |

Below are the feature weights of the final CAD phenotype algorithms. The weights below can be used to derive a predicted probability of CAD or no CAD for any Biobank participant.

| Feature_ID                           |  | Beta (weight)    | Feature Description                                                                  |
|--------------------------------------|--|------------------|--------------------------------------------------------------------------------------|
| (Intercept)                          |  | 5.288948213      | Model Intercept (beta 0)                                                             |
| patient_dxent                        |  | -<br>3.121364389 | Number of encounters with ICD-9 codes                                                |
| CAD_COD_DX_IschemicHeartDisease      |  | 1.934743408      | Coded mentions of a Ischemic Heart Disease diagnosis                                 |
| CAD_NLP_alcohol                      |  | 0.16107732       | Hitex non-negated NLP mentions of UMLS CUI C0001962: alcohol                         |
| CAD_NLP_angioplasty                  |  | 0.022473675      | Hitex non-negated NLP mentions of UMLS CUI C0162577: angioplasty                     |
| CAD_NLP_antiplatetagents             |  | 0.503346441      | Hitex non-negated NLP mentions of UMLS CUI C0085826: antiplatelet agents             |
| CAD_NLP_coronaryarterybypassgrafting |  | 1.054659295      | Hitex non-negated NLP mentions of UMLS CUI C0010055: coronary artery bypass grafting |
| CAD_NLP_coronaryatherosclerosis      |  | -<br>1.194440371 | Hitex non-negated NLP mentions of UMLS CUI C0010054: coronary atherosclerosis        |
| CAD_NLP_coronaryheartdisease         |  | 2.588093909      | Hitex non-negated NLP mentions of UMLS CUI C0010068: coronary heart disease          |

|                                       |  |                  |                                                                                      |
|---------------------------------------|--|------------------|--------------------------------------------------------------------------------------|
| CAD_NLP_creatinine                    |  | -<br>0.342506235 | Hitex non-negated NLP mentions of UMLS CUI C0010294: creatinine                      |
| CAD_NLP_electrocardiogram             |  | -1.62020437      | Hitex non-negated NLP mentions of UMLS CUI C0013798: electrocardiogram               |
| CAD_NLP_ischemia                      |  | 1.037838709      | Hitex non-negated NLP mentions of UMLS CUI C0022116: ischemia                        |
| CAD_NLP_ischemiccardiomyopathy        |  | -<br>0.106484107 | Hitex non-negated NLP mentions of UMLS CUI C0349782: ischemic cardiomyopathy         |
| CAD_NLP_myocardialinfarction          |  | 0.230624677      | Hitex non-negated NLP mentions of UMLS CUI C0027051: myocardial infarction           |
| CAD_NLP_nitroglycerin                 |  | 1.769966347      | Hitex non-negated NLP mentions of UMLS CUI C0017887: nitroglycerin                   |
| CAD_NLP_plateletaggregationinhibitors |  | 0.433529361      | Hitex non-negated NLP mentions of UMLS CUI C0032177: platelet aggregation inhibitors |

Below are the feature weights of the final depression phenotype algorithms. The weights below are used to derive a predicted probability of depression or no depression for every Biobank participant.

| <b>Feature_ID</b>            | <b>Beta (weight)</b> | <b>Feature Description</b>                    |
|------------------------------|----------------------|-----------------------------------------------|
| (Intercept)                  | -2.539               | Model Intercept (beta 0)                      |
| Depression_COD_DX_Depression | 1.973                | Count of coded diagnosis of depression or MDD |

|                                         |        |                                                        |
|-----------------------------------------|--------|--------------------------------------------------------|
| Depression_COD_DX_Mentalhealthdisorders | 0.175  | Count of coded diagnosis of any mental health disorder |
| Depression_COD_DX_Bipolardisorder       | -0.813 | Count of coded diagnosis of bipolar disorder           |
| Depression_COD_MED_Antidepressants      | 1.096  | Count of prescriptions for an antidepressant           |
| Depression_COD_MED_Antipsychotics       | -0.395 | Count of prescriptions for an antipsychotic            |
| Depression_COD_MED_Anticonvulsants      | -0.323 | Count of prescriptions for an anticonvulsant           |
| patient_dxenct                          | -0.515 | Total number of visits with a coded diagnosis          |

Below are the feature weights of the final CHF phenotype algorithms. The weights below can be used to derive a predicted probability of CHF or no CHF for any Biobank participant.

| <b>Feature_ID</b>              | <b>Beta (weight)</b> | <b>Feature Description</b>                                                   |
|--------------------------------|----------------------|------------------------------------------------------------------------------|
| (Intercept)                    | -0.85309914          | Model Intercept (beta 0)                                                     |
| patient_dxenct                 | -0.790872064         | Number of encounters with an ICD-9 code                                      |
| CHF_COD_DX_CHF                 | 0.299480034          | Count of CHF diagnoses                                                       |
| CHF_NLP_heartfailure           | 0.36842715           | Hitex non-negated NLP mentions of UMLS CUI C0018802: heart failure           |
| CHF_NLP_ischemiccardiomyopathy | 0.39455684           | Hitex non-negated NLP mentions of UMLS CUI C0349782: ischemic cardiomyopathy |
| CHF_NLP_loopdiuretics          | 0.650788804          | Hitex non-negated NLP mentions of UMLS CUI C0354100: loop diuretics          |

Below are the feature weights of the final Ischemic stroke phenotype algorithms. The weights below are used to derive a predicted probability of ISTR for every Biobank participant.

| <b>Feature_ID</b>                   | <b>Beta (weight)</b> | <b>Feature Description</b>                                     |
|-------------------------------------|----------------------|----------------------------------------------------------------|
| (Intercept)                         | 2.640                | Model Intercept (beta 0)                                       |
| Stroke_COD_DX_IschemicStroke        | 1.205                | Count of coded diagnosis of ischemic stroke                    |
| Stroke_COD_DX_HemorrhagicStroke     | -0.507               | Count of coded diagnosis of hemorrhagic stroke                 |
| Stroke_NLP_brainattack              | 0.828                | Count of non-negated NLP mentions of brain attack              |
| Stroke_NLP_transientischaemicattack | -0.137               | Count of non-negated NLP mentions of transient ischemic attack |
| patient_dxenct                      | -1.480               | Total number of visits with a coded diagnosis                  |

### **Genetic data**

De-identified genetic data was requested from the MGBB. Whole blood samples are collected from participants during research draws or at the time of clinical draws. Samples are genotyped in batches using three versions of Illumina SNP array. Imputed genotype data from Multi-Ethnic Genotyping Array (MEGA), Expanded Multi-Ethnic Genotyping Array (MEGA Ex), and Multi-Ethnic Global (MEG) BeadChip were included in this analysis. Imputation was performed using the Michigan Imputation Server with a Minimac3. Only variants on the 22 autosomal chromosomes were considered. Data were obtained in 8 batches/sub-cohorts: Batch 1: MEG\_A1\_A ( $n=4780$ ), Batch 2: MEG\_A1\_B ( $n=5020$ ), Batch 3: MEG\_C ( $n=5492$ ), Batch 4: MEG\_D ( $n=5146$ ), Batch 5: MEG\_E ( $n=4850$ ), Batch 6: MEG\_X1 ( $n=866$ ), Batch 7: MEGA ( $n=4924$ ), Batch 8: MEGAEX ( $n=5344$ ).

## **Preprocessing and QC of genetic data**

QC was performed on each batch individually and merged together, resulting in a total of 36,422 individuals and 9,036,179 variants after imputation. Unique ID's (rsID's) of variants were inserted based on chromosomal locations from the dbSNP database. Variants were filtered with two more criteria: minor allele frequency ( $MAF > 0.01$ ) and Hardy-Weinberg equilibrium ( $HWE\ p > 1E-6$ ). This resulted in 6,001,335 SNPs.

## **Mendelian randomization analyses**

Genetic correlations and phenotypic comorbidity between PTSD/MDD and hypertension (and cardiovascular illnesses in general) have been repeatedly reported. In the current manuscript we demonstrated significant genetic correlations between the two psychiatric disorders and cardiovascular illnesses with a robust statistical evidence. These correlations observed at various levels may stem from one of the following four scenarios/mechanisms.

- Scenario 1: Onset of MDD/PTSD causes higher predisposition to hypertension and other cardiovascular illnesses. This could possibly be mediated by lifestyle changes (such as smoking and less exercise/mobility) and subsequent decline in anthropometric measurements (such as higher BMI).
- Scenario 2: Existence of cardiovascular illnesses leads to elevated predisposition to MDD/PTSD.
- Scenario 3: Both MDD/PTSD and cardiovascular illness are caused by shared genetic variants. This shared genetic underpinning can possibly influence distinct pathways/processed in the two groups of disorders. This is commonly known as horizontal pleiotropy.

- Scenario 4: MDD/PTSD and hypertension are caused by separate genetic variants that happen to be in linkage disequilibrium with each other.

It is important to note previous publications suggesting positive causal effect of MDD on cardiovascular diseases (Scenario 1 above) [PMID: 33032663], [PMID: 33372528]. Another interesting observation is the significant difference in age distribution between the two group of disorders. In the MGBB data, the median age for PTSD-positive and MDD-positive patients are 51 and 62; while the median age for hypertension and CAD positive patients are 70 and 75, respectively. Hence, those diagnosed with cardiovascular illnesses are, on average, significantly older than those diagnosed with the psychiatric disorders. Even if this is not observed on a longitudinal follow-up observation, it is suggestive of the sequence of which disorder is likely to be diagnosed first.

Here, we hypothesize that there is a causal link from MDD/PTSD to hypertension. The gold standard for inferring a causal link is Randomized control trial (RCT). However, in most situations, RCT is not feasible and requires a long timeframe to implement. This holds true in our current dataset as well. A feasible alternative that is cost-effective and implementable using our current study data is Mendelian Randomization (MR) [PMID: 34698778]. MR can be thought of as a ‘randomized trial’ where randomization is done at birth, where predisposing genetic variants are assorted randomly from parents to offspring [PMID: 19509388]. In other words, the predisposing genetic variants can be thought of as proxies for randomized intervention (assuming random mating).

MR is a special case of what is commonly known as instrumental variable analysis where genetic variation is used as the instrumental variable [PMID: 26282889]. For a variable to be

used as an instrumental variable (genetic variants in MR case), three main assumptions should hold true: (1) Relevance: the genetic variant is associated with the exposure, (2) Exclusion restriction: the genetic variant does not affect the outcome directly, and (3) Random assignment: the genetic variant does not affect the outcome through confounding variables. The main goal is to infer a causal link from the exposure variable to the outcome variable.

To test the causal link from MDD/PTSD to hypertension using MR, MDD/PTSD is our exposure variable and hypertension is the outcome variable. There are two possible choices for genetic variants as instrumental variables. The first and more common approach is to select few individual variants that are significantly associated with the exposure. MR analysis is conducted on each genetic variant as the instrumental variable and the results are combined afterwards. The second approach is to use polygenic risk scores as instrumental variables. The use of polygenic scores instead of using multiple individual variants (by far the most common approach) has been shown to mitigate instrumental variable bias (PMID:24062299).

Here, we use polygenic scores computed in the current manuscript to conduct the MR procedure. We implemented a procedure commonly known as two stage least square regression (2SLS) [PMID: 24114802]. In the first stage, the exposure (binary MDD label) is regressed against MDD polygenic risk score and along with confounders we want to control for (age and the first five principal components). Using this regression model, predicted value of the exposure is computed (MDD\_hat). In the second stage, the outcome variable (hypertension binary label) is regressed against the predicted exposure variable (MDD\_hat) and the potential confounding variables (age and the first five principal components). Then, (epidemiological) causality is inferred based on the significance of the coefficient of the predicted exposure variable (MDD\_hat). The result of the statistics of the coefficient is shown below.



| Estimate | Std. Error | p        | Significance |
|----------|------------|----------|--------------|
| 0.428    | 0.095      | 5.97E-06 | ***          |

Therefore, we can infer that MDD onset is linked to hypertension diagnosis. We implemented a similar MR procedure for three other models. The results are shown in the table below.

| Model                 | beta  | Std. Error | p        |
|-----------------------|-------|------------|----------|
| MDD --> hypertension  | 0.428 | 0.095      | 5.97e-06 |
| MDD --> CAD           | 0.466 | 0.141      | 9.22e-04 |
| PTSD --> hypertension | 0.201 | 0.044      | 5.97e-06 |
| PTSD --> CAD          | 0.219 | 0.066      | 9.22e-04 |

  

| Model                 | beta  | Std. Error | p      |
|-----------------------|-------|------------|--------|
| hypertension --> MDD  | 0.054 | 0.048      | 0.258  |
| hypertension --> PTSD | 0.144 | 0.068      | 0.0345 |
| CAD --> MDD           | 0.157 | 0.075      | 0.0373 |
| CAD --> PTSD          | 0.310 | 0.108      | 0.0041 |

As shown, our analysis provides support for a causal link from psychiatric disorders to cardiovascular illnesses, but not the other way around.

Note that all analysis is only for EUR sub-population of the MGBB dataset. In the future, similar analysis on sub-populations (based on ancestry, gender and age) needs to be conducted.

All analysis is done on R statistical software.

## CRP analyses

We investigated genetic level correlations between the two groups of phenotypes and the largest publicly available CRP GWAS summary statistics (PMID: 33462484). As expected, CRP level in the blood is genetically correlated with both group of phenotypes. The main result is summarized below.

| Summary statistics          | $r_g$  | p        |
|-----------------------------|--------|----------|
| Hypertension_meta           | 0.3183 | 5.98E-16 |
| UKBB_Essential_Hypertension | 0.3206 | 6.06E-16 |
| CAD_meta                    | 0.2254 | 1.04E-07 |
| UKBB_broad_Depression       | 0.2326 | 4.63E-07 |
| PGC_MDD2018_ex23andMe       | 0.1691 | 2.70E-05 |
| MDD_meta                    | 0.1622 | 5.46E-05 |
| PTSD_meta                   | 0.2211 | 0.000138 |
| pts_eur_freeze2             | 0.1859 | 0.001913 |

## Supplementary Tables and Figures

\*\*\* *Figures S5–S22 are provided in a separate file.* \*\*\*

|                 |         | estimated |      |     |      | Total |
|-----------------|---------|-----------|------|-----|------|-------|
|                 |         | EUR       | AFR  | EAS | SAS  |       |
| self-identified | White   | 30296     | 107  | 13  | 318  | 30734 |
|                 | Black   | 31        | 1759 | 0   | 19   | 1809  |
|                 | Asian   | 17        | 10   | 487 | 274  | 788   |
|                 | Other   | 327       | 222  | 12  | 541  | 1102  |
|                 | Unknown | 1087      | 315  | 34  | 552  | 1988  |
| Total           |         | 31758     | 2413 | 546 | 1704 | 36421 |

TABLE S1. Self-identified and genetically predicted ancestry composition. Genetic analysis was done with those participants predicted to have EUR ancestry.

TABLE S2. List of publicly available summary statistics used in the current study

| Study name                         | Phenotype                      | Type of variable | Cases/controls or n | Sample description            | No. of variants | SNP heritability (SE) | Reference       |
|------------------------------------|--------------------------------|------------------|---------------------|-------------------------------|-----------------|-----------------------|-----------------|
| <b>ptsd_eur_freeze2</b>            | PTSD                           | binary           | 23,212/151,447      | PGC freez-2<br>EUR            | 9.77M           | 0.063 (0.011)         | (PMID:31594949) |
| <b>PGC_MDD2018_ex23andMe</b>       | MDD                            | binary           | 59,851/113,154      | PGC                           | 13.5M           | 0.076 (0.005)         | (PMID:29700475) |
| <b>UKBB_probable_MDD</b>           | Probable MDD                   | binary           | 30,603/143,916      | UKBB                          | 7.67M           | 0.022 (0.003)         | (PMID:29662059) |
| <b>UKBB_ICD_MDD</b>                | MDD                            | binary           | 8,276/209,308       | UKBB                          | 7.67M           | 0.019 (0.002)         | (PMID:29662059) |
| <b>UKBB_broad_Depression</b>       | Depression                     | binary           | 113,769/208,811     | UKBB                          | 7.67M           | 0.063 (0.003)         | (PMID:29662059) |
| <b>UKBB_Essential_Hypertension</b> | Hypertension                   | binary           | 77,723/330,366      | UKBB                          | 28.3M           | 0.074 (0.004)         | (PMID:32589924) |
| <b>UKBB_doctor_highBP</b>          | High blood pressure            | binary           | 144,793/313,761     | UKBB                          | 5.26M           | 0.127 (0.006)         | (PMID:30940143) |
| <b>Hypertension_diverse</b>        | Hypertension                   | binary           | 27,123/22,018       | Ancestrally<br>diverse cohort | 28.3M           | 0.042 (0.009)         | (PMID:31217584) |
| <b>CAD_Nikpay</b>                  | CAD                            | binary           | 60,801/123,504      | mostly EUR                    | 6.7M            | 0.076 (0.008)         | (PMID:26343387) |
| <b>UKBB_ICBP_SBP</b>               | SBP                            | quantitative     | 757K                | UKBB & ICBP*                  | 7.4M            | 0.140 (0.006)         | (PMID:30224653) |
| <b>UKBB_ICBP_DBP</b>               | DBP                            | quantitative     | 757K                | UKBB & ICBP*                  | 7.4M            | 0.136 (0.006)         | (PMID:30224653) |
| <b>UKBB_ICBP_PP</b>                | pulse pressure<br>(PP=SBP-DBP) | quantitative     | 757K                | UKBB & ICBP*                  | 7.4M            | 0.123 (0.005)         | (PMID:30224653) |
| <b>UKBB_RHR</b>                    | HR resting                     | quantitative     | 460K                | UKBB                          | 5.26M           | 0.152 (0.012)         | (PMID:30940143) |
| <b>HR50</b>                        | HR recovery                    | quantitative     | 58.8K               | EUR                           | 14.7M           | 0.030 (0.005)         | (PMID:29497042) |
| <b>HRinc</b>                       | HR increase                    | quantitative     | 58.8K               | EUR                           | 14.7M           | 0.03 (0.003)          | (PMID:29497042) |

*Note.* PTSD = posttraumatic stress disorder; CVD = cardiovascular disease; MDD = major depressive disorder; CAD = coronary artery disease; SBP = systolic blood pressure; DBP = diastolic blood pressure; HR = heart rate; SNP = single nucleotide polymorphism; SE = standard error; UKBB & ICBP: UKBB (n=458) + International Consortium for BP GWAS (n=150K+149K).

TABLE S3. Genetic correlations among PTSD/MDD and CVD (hypertension/CAD)

|                                    | <b>PGC_MDD2018</b>     | <b>UKBB_broad_Depression</b> | <b>UKBB_Essential_Hypertension</b> | <b>Nikpay_CAD</b>      |
|------------------------------------|------------------------|------------------------------|------------------------------------|------------------------|
|                                    | rG (S.E.), p           | rG (S.E.), p                 | rG (S.E.), p                       | rG (S.E.), p           |
| <b>ptsd_eur_freeze2</b>            | 0.78 (0.086), 1.99E-19 | 0.67 (0.074), 1.93E-19       | 0.34 (0.061), 1.91E-08             | 0.27 (0.082), 8.83E-4  |
| <b>PGC_MDD2018_ex23andMe</b>       |                        | 0.92 (0.029), 1.65E-225      | 0.28 (0.029), 6.74E-22             | 0.18 (0.046), 1.34E-4  |
| <b>UKBB_broad_Depression</b>       |                        |                              | 0.22 (0.028), 3.07E-15             | 0.19 (0.039), 1.01E-06 |
| <b>UKBB_Essential_Hypertension</b> |                        |                              |                                    | 0.55 (0.038), 6.01E-47 |

Note. Correlation results using publicly available summary statistics.

TABLE 4. Mendelian randomization results suggest causal pathway from PTSD and MDD to hypertension

| Model                 | Estimate | Std. Error | p        |     |
|-----------------------|----------|------------|----------|-----|
| MDD --> hypertension  | 0.3970   | 9.31E-02   | 2.04E-05 | *** |
| hypertension --> MDD  | 0.0539   | 4.76E-02   | 0.257656 |     |
| PTSD --> hypertension | 0.3818   | 0.104408   | 0.000255 | *** |
| hypertension --> PTSD | 0.0539   | 4.76E-02   | 0.257656 |     |

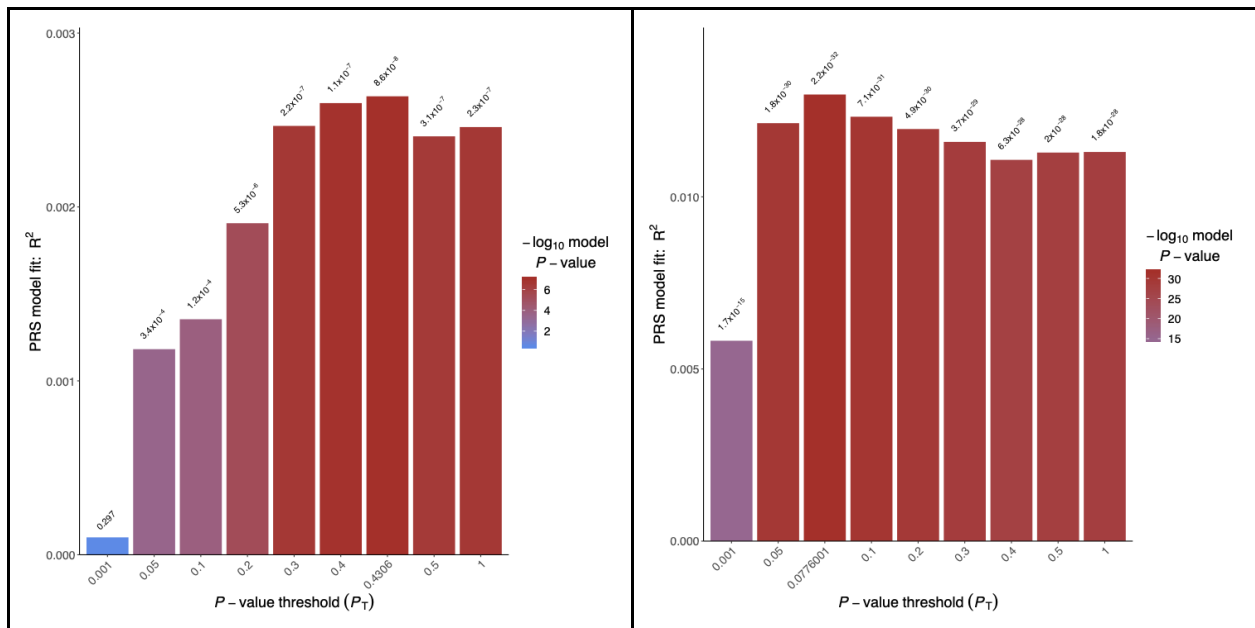

FIGURE S1. Thresholding step with MTAG summary statistics for PTSD polygenic risk score (PRS)

| Base summary stats        | Target phenotype | PRS R <sup>2</sup> | PRS P-value | P-value threshold | Num_SNP |
|---------------------------|------------------|--------------------|-------------|-------------------|---------|
| CAD-Hypertension          | CAD              | 0.0104702          | 9.99E-42    | 0.1862            | 22,138  |
| CAD-Hypertension-PTSD-MDD | CAD              | 0.0106199          | 2.89E-42    | 0.14535           | 18,242  |
| Hypertension-CAD          | hypertension     | 0.0169782          | 7.26E-114   | 0.0265001         | 6,743   |
| Hypertension-CAD-PTSD-MDD | hypertension     | 0.0172907          | 6.72E-116   | 0.0420001         | 8,981   |

FIGURE S2. Improvement in the prediction of coronary artery disease (CAD) and hypertension using PTSD and MDD summary statistics

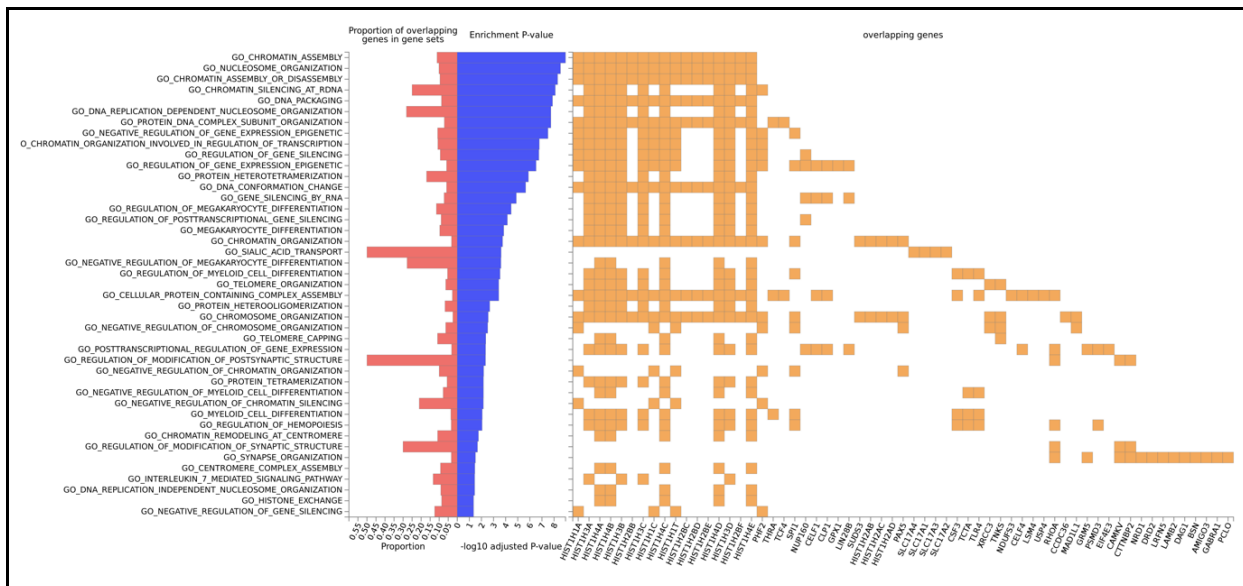

FIGURE S3. Genomic risk loci included in pathway analysis

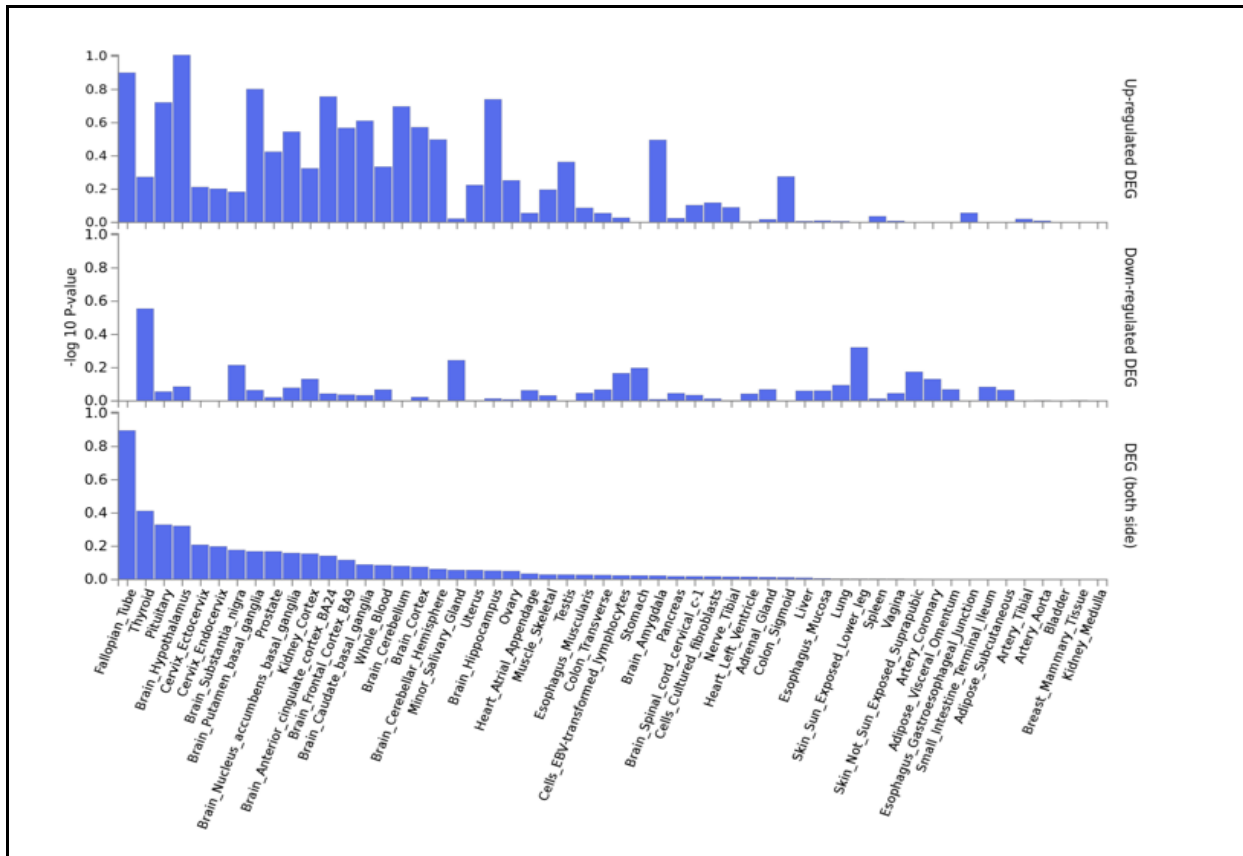

FIGURE S4. Tissue specificity of pathway analysis
